# 1      **Selective Filopodia Adhesion Ensures Robust Cell Matching in the *Drosophila* Heart**

2                      Shaobo Zhang<sup>1</sup>, Christopher Amourda<sup>1</sup> and Timothy E. Saunders<sup>1,2,3,#</sup>

3                      <sup>1</sup> Mechanobiology Institute, National University of Singapore, Singapore

4                      <sup>2</sup> Department of Biological Sciences, National University of Singapore, Singapore

5                      <sup>3</sup> Institute of Molecular and Cell Biology, A\*Star, Proteos, Singapore

6                                      # For correspondence: [dbsste@nus.edu.sg](mailto:dbsste@nus.edu.sg)

## 7      **Summary**

8      The ability to form specific cell-cell connections within complex cellular environments is  
9      critical for multicellular organisms. However, the underlying mechanisms of cell matching that  
10     instruct these connections remain elusive. Here, we explore the dynamic regulation of matching  
11     processes utilizing *Drosophila* cardiogenesis. During embryonic heart formation, cardioblasts  
12     (CBs) form precise contacts with their partners after long-range migration. We find that CB  
13     matching is highly robust at the boundaries between distinct CB subtypes. Filopodia in these  
14     CB subtypes have different binding affinities. We identify the adhesion molecules Fasciclin III  
15     (Fas3) and Ten-m as having complementary differential expression in CBs. Altering Fas3  
16     expression influences the CB filopodia selective binding activities and CB matching. In  
17     contrast to single knockouts, loss of both Fas3 and Ten-m dramatically impairs CB alignment.  
18     We propose that differential expression of adhesion molecules mediates selective filopodia  
19     binding, and these molecules work in concert to instruct precise and robust cell matching.

20     **Keywords:** Cell Matching, Filopodia, Differential Adhesion, Fasciclin III, Teneurins,  
21     *Drosophila* Cardiogenesis, Robustness

## 22 **Introduction**

23 Multicellular organisms contain a wide variety of differentiated cells that are specifically  
24 connected to their partners. Cell matching is the process that facilitates the formation of these  
25 connections within a complicated cellular environment that undergoes dramatic cell migration  
26 and rearrangement, and it is required for reliable embryogenesis and tissue remodeling (Dixon  
27 et al., 2011; Goodman and Shatz, 1993; Maragoudakis, 2000; Shinbane et al., 1997).  
28 Neurogenesis has been one of the favored models to understand how accurate cell matching  
29 occurs. Indeed, despite the complex cellular environment and dramatic cell rearrangement,  
30 neurons reliably recognize and form precise interconnections with their synaptic partners, and  
31 this is essential to the proper functions of the brain (Goodman and Shatz, 1993; Katz and Shatz,  
32 1996; Woolf, 2000). Many other processes, such as neural crest formation (Sauka-Spengler  
33 and Bronner-Fraser, 2008), facial development (Dixon et al., 2011), angiogenesis (Adams and  
34 Alitalo, 2007) and wound healing (Martin, 1997), require similar cell matching to generate  
35 reliable cell-cell connections and eventually build robust biological architectures.

36 Filopodia, thin and actin-rich pioneer cell membrane protrusions, mediate cell matching  
37 through sensing the surrounding cellular environment (Davenport et al., 1993; Eilken and  
38 Adams, 2010; Jacinto et al., 2000; Tessier-Lavigne and Goodman, 1996). Recent studies have  
39 shown that filopodia in neuronal cells have selective stabilization properties and these  
40 dynamics specify growth cone stabilization and neural circuit formation (Hua and Smith, 2004;  
41 Özel et al., 2015; Xu et al., 2009). Various selective cell-cell adhesive molecules, such as  
42 Cadherins (Takeichi, 1987, 1988), immunoglobulin (Ig) superfamily proteins (Maness and  
43 Schachner, 2007; Williams and Barclay, 1988) and Teneurins (Hong et al., 2012; Mosca, 2015),  
44 have also been reported to instruct accurate cell matching, through homophilic and/or  
45 heterophilic interactions. Identification of these components involved in cell matching has  
46 largely been achieved through genetic studies in neurogenesis. However, their underlying

47 mechanisms, especially the dynamic regulation of cell matching remains elusive, partially due  
48 to the complexity and limited accessibility for *in vivo* live imaging of the nervous systems.  
49 Here, we looked to investigate the process of cell matching in a simpler system - *Drosophila*  
50 embryonic heart formation - which facilitates quantitative live imaging of the cell matching  
51 process.

52 The *Drosophila* heart is a linear organ formed by two contralaterally symmetric rows of  
53 connected cardioblasts (CBs). These contralateral symmetric rows of CBs are initially around  
54 100  $\mu\text{m}$  apart. Concomitantly with dorsal closure, contralateral CBs collectively migrate  
55 towards the dorsal midline, closing the gap between the rows, and meet with their  
56 corresponding partners (Stage 16) (Bodmer and Frasch, 2010; Vogler and Bodmer, 2015). This  
57 process is reminiscent of the primitive heart tube formation in vertebrates (Bodmer, 1995;  
58 Srivastava and Olson, 2000). At the end of CB migration, heart cells from contralateral sides  
59 establish a one-to-one alignment (Figure 1A) and form a tube structure (Bodmer and Frasch,  
60 2010; Vogler and Bodmer, 2015). Subsequently, the heart tube is divided into two domains:  
61 the anterior aorta and the posterior heart (Figure 1A). CBs are composed of distinct subtypes  
62 distributed in a repetitive fashion with four cells expressing the homeobox gene *tinman* (*tin*),  
63 and two expressing the orphan nuclear receptor gene *seven-up* (*svp*) (Figure 1A). This 4-2 cell  
64 arrangement persists throughout the CBs migration. In a fully formed heart, these CB subtypes  
65 give rise to distinct functional structures with significant morphological differences: Svp-  
66 positive CBs form ostia, while Tin-positive CBs constitute the major heart lumen and cardiac  
67 valves (Lehmacher et al., 2012; Medioni et al., 2009; Molina and Cripps, 2001). In vertebrate  
68 cardiomyopathy studies, cell misalignment can cause heart failure (Shinbane et al., 1997;  
69 Umana et al., 2003), indicating that proper contralateral cell matching is critical for heart  
70 function. Thus, as a confined system (continuous structure, predictable migration direction, and  
71 no cell division) amenable to *in vivo* live imaging and genetic perturbation (Bodmer and Frasch,

2010; Vogler and Bodmer, 2015), the formation of the *Drosophila* heart is an excellent system for studying the underlying mechanisms of cell matching.

In this study, we show that active *Drosophila* CB matching primarily occurs at the boundaries between distinct CB subtypes. Hearts without different CB subtypes have dramatic CB mismatch. We reveal that CB filopodia have differential binding affinity in distinct cell types, with stronger adhesion between Tin-positive CBs. Through candidate screening, we identify that FasciclinIII (Fas3) and Ten-m (known as Tenascin-major in *Drosophila*) have complementary differential expression patterns in the heart. Fas3, belonging to the Ig superfamily (Chiba et al., 1995), shows higher expression in Tin-positive CBs. Changing Fas3 expression levels and pattern in CBs alters their filopodia binding activities and leads to CB mismatch. Ten-m, belonging to the Teneurins (Hong et al., 2012), shows higher expression in Svp-positive CBs. Losing Ten-m causes CB arrangement defects and cell mismatch. However, loss of either Ten-m or Fas3 does not fully abolish the active CB matching, as the other adhesion molecule appears able to partially compensate. In contrast, embryos without both Fas3 and Ten-m have dramatic CB matching defects, with a similar mismatch level to mutants without different CB subtypes. Therefore, our results suggest that differential adhesion regulates the filopodia selective binding activity and this provides a simple but efficient mechanism to instruct precise and robust cell matching.

## Results

### Active *Drosophila* CB matching is cell-type dependent and short ranged

After long-range migration, CBs typically form near-perfect alignment with their partners from the contralateral side (Figure 1A) (Bodmer and Frasch, 2010; Vogler and Bodmer, 2015). Yet, malformed hearts are observed in ~8% (7/84) of wild-type embryos, potentially due to natural variation. To test whether cell alignment is required for heart function, we imaged the heart

96 beating in embryos where CBs are labeled with Hand::GFP (Han, 2006). Compared to well-  
97 matched hearts (Figure S1A and Movie S1 Left), both the morphology and function are  
98 impaired in hearts with misaligned CBs (Figure S1B and Movie S1 Right). In these embryos  
99 with misaligned CBs, the nuclear separation between contralateral CB partners in the aorta  
100 domain reduces from  $\sim 6$  to  $\sim 4$   $\mu\text{m}$  and the heart beating does not propagate through the  
101 mismatched regions.

102 Through closer examination of the membrane contacts between contralateral CBs in wildtype  
103 embryos, we noticed that contact mismatch between CBs of different subtypes is quite rare,  
104 but relatively common between CBs of the same subtype (Figure 1B). Even in embryos where  
105 the 4-2 pattern of the Tin- and Svp-positive CBs is disrupted ( $n=15/84$ ), the cell matching  
106 remains precise at the CB subtype boundaries (Figure 1C). Quantifying the CB contact  
107 mismatch (denoted by  $\delta$ ) in the aorta region (Figure 1D), we found that contacts of adjacent  
108 Tin- and Svp-positive CBs show considerably smaller degree of mismatch when compared  
109 with the adjacent Tin-positive CBs ( $\delta_{\text{Tin-Svp}}=0.06\pm 0.03$ ,  $\delta_{\text{Tin-Tin}}=0.13\pm 0.07$ , Figure 1E). To test  
110 whether distinct cell types are necessary for precise CB alignment, we investigated the cell  
111 matching in *svp*<sup>-</sup> mutant embryos, where all the CBs are Tin-positive (Lo and Frasch, 2001).  
112 We found that such hearts show severe matching defects (Figure 1F) with dramatically higher  
113  $\delta$  compared with wild-type embryos ( $\delta_{\text{WT}}=0.13\pm 0.05$ ,  $\delta_{\text{svp-}}=0.27\pm 0.04$ , Figure 1G). Moreover,  
114 in embryos with the *TM3* balancer, which carries a mutation in the CB patterning gene *Ubx*  
115 (Ponzielli *et al.*, 2002), we found that the distinct CB subtypes are able to align, except for the  
116 regions with severely perturbed CB arrangement (Figures S1C and S1D). These results suggest  
117 distinct cell types are necessary for robust *Drosophila* CB matching.

118 To further explore when and where active CB matching happens, we tracked Hand::GFP  
119 labeled CBs throughout heart closure (Figure 1H-1I) and measured the misalignment between  
120 partner CBs based on their centroids (Figures 1J and 1K, Methods). The CB misalignment

121 gradually decreases throughout formation of the heart (Figure 1K). However, once CBs  
122 approach within a separation of  $\sim 15\text{-}20\ \mu\text{m}$ , after the completion of dorsal closure (Figure S1E),  
123 positional readjustments relative to their contralateral partners are more frequent (Figure 1I and  
124 1J, Movie S2), and correspondingly rapid changes in the cell misalignment quantification are  
125 observed (Figure 1K). Interestingly, the increase in cell alignment during this active stage of  
126 CB positional adjustment ( $0.12\pm 0.04$ , Figure 1K) is comparable to the difference in the  
127 measured contact mismatch ( $\delta$ ) between *svp*<sup>-</sup> and wildtype embryos ( $\delta_{svp^-} - \delta_{WT} = 0.14$ , Figure  
128 1G). Further, by imaging Hand::GFP labeled CBs throughout cardiogenesis, we observed no  
129 significant changes in the relative position of CBs after the contralateral sides fully meet at the  
130 midline (Figure S1F).

131 Taken together, active CB matching requires proper heart cell differentiation and occurs when  
132 the contralateral cells are within  $\sim 15\text{-}20\ \mu\text{m}$  apart, which is after dorsal closure and precedes  
133 the complete coalescence of the contralateral rows of CBs.

#### 134 **Filopodia show differential binding affinity in distinct CB subtypes**

135 We next sought to identify the subcellular components that are responsible for accurate CB  
136 matching. Considering the active CB matching happens within a short distance, we explored  
137 filopodia activity during the matching process. Filopodia are known to guide cell recognition  
138 and short range targeting in other systems (Davenport et al., 1993; Eilken and Adams, 2010;  
139 Jacinto et al., 2000; Özel et al., 2015). To test whether they also regulate heart cell matching,  
140 we imaged the CB filopodia activity (Figure 2A) by driving Moesin (Moe)::GFP (Edwards et  
141 al., 1997) expression in all CBs using Hand-Gal4 (Han, 2006). As reported previously (Haack  
142 et al., 2014; Swope et al., 2014), CBs filopodia are highly dynamic, protruding and retracting  
143 repeatedly (Movie S3 Left). At a cell center separation of  $\sim 15\text{-}20\ \mu\text{m}$ , we observed that  
144 contralateral CBs initiate physical contacts through filopodia (Figure 2A). This process persists

145 for around 30 minutes until the two sides completely adhere with each other. Closer  
146 examination of the matching process showed that after forming filopodia contacts, CBs adjust  
147 the relative matching position towards their contralateral partners (Figure 2A).

148 Critically, we found that CB filopodia have selective binding properties. After initial contact,  
149 a subset of filopodia from opposing cells stabilize their contacts and show accumulated  
150 Moe::GFP signal (Figure 2B and Movie S3 Left), indicating increased actin-related activities.  
151 Eventually, these stabilized filopodia enlarge their contact area and direct the corresponding  
152 CBs toward each other. We found that the binding time of filopodia contacts for all CBs is  
153 around  $185 \pm 141$ s. This large variation is explained by the fact that 19% of observed contacts  
154 persisted over 300s whilst 33% lasted less than 100s (Figure 2C). In embryos where distinct  
155 CB subtypes can be distinguished (Figure S2A-S2B), strong filopodia binding is observed  
156 forming between Tin-positive CBs (Figure S2B). To further determine whether this selective  
157 binding property is related to distinct cell types, we examined the filopodia activity in different  
158 CB subtypes using cell specific Gal4 drivers. When driving Moe::GFP expression under TinC-  
159 Gal4 (Lo and Frasch, 2001), we observed leaking expression of Moe::GFP, not only in Svp-  
160 positive CBs but also in the aminoserosa cells between the contralateral CBs (Figure S2C). In  
161 contrast, Moe::GFP driven by Svp-Gal4 (Pfeiffer et al., 2008) shows specific expression  
162 (Figure 2D). In these embryos, we found that the filopodia contacts between Svp-positive CBs  
163 rarely stabilize (Figure 2D and Movie S4 Left), and show much shorter binding time (averaged  
164 binding time=130s, with 6.3% of contacts persisting over 300s, Figure 2C). Adhesion between  
165 these Svp-positive CBs does not occur until larger lamellipodia contacts form (Movie S4 Left).  
166 These Svp-positive CBs are also more rounded during migration, which appears to minimize  
167 their contact with the neighboring cellular environment. Altogether, these data suggest that  
168 filopodia of Tin-positive CBs have higher binding affinity compared with the ones of Svp-  
169 positive CBs.

170 As the molecular mechanisms of CB filopodia formation and activity are still unknown (Haack  
171 et al., 2014), we perturbed filopodia activity in CBs by expressing a dominant-negative allele  
172 of Cdc42 (Cdc42<sup>N17</sup>) (Luo et al., 1994) using Hand-Gal4. Cdc42 is a small GTPase that  
173 regulates polarity establishment, cell migration and filopodia activity (Hall, 1998; Mattila and  
174 Lappalainen, 2008), and in contrast to Rac and Rho, it is essential for heart morphogenesis and  
175 lumen formation (Swope et al., 2014; Vogler et al., 2014). Expressing Cdc42<sup>N17</sup> in the heart,  
176 we observed no significant change in the density of CB filopodia compare with control  
177 ( $0.45 \pm 0.15$  filopodia/ $\mu\text{m}$  in Cdc42<sup>N17</sup>,  $0.47 \pm 0.07$  filopodia/ $\mu\text{m}$  in control, Figure S2A).  
178 However, Cdc42<sup>N17</sup> expression leads to decreased filopodia binding affinity and loss of obvious  
179 Moe::GFP accumulation (Figure 2E and Movie S3 Right), with corresponding reduction in  
180 filopodia binding time (averaged binding time=150.9s, with 11.9% persisting more than 300s,  
181 Figure 2C). Heart morphology in Cdc42<sup>N17</sup> expressing embryos is dramatically perturbed, with  
182 many unclosed gaps between contralateral CBs (18/34 embryos), CB misalignment and high  
183 cell mismatch ( $\delta=0.31 \pm 0.07$ , Figure 2F-2H). In contrast, when expressing a dominant-negative  
184 allele of the small GTPase Rac (Rac<sup>N17</sup>) (Luo et al., 1994) under the same Hand-Gal4 driver,  
185 we observed no obvious changes in either filopodia density ( $0.46 \pm 0.10$  filopodia/ $\mu\text{m}$ , Figure  
186 S2D) or filopodia binding activity (averaged binding time=179.2s, with 16.6% persisting more  
187 than 300s, Figure 2C and Figure S2E). Examining the heart morphology, we did not observe  
188 either significant perturbation of heart structure or CB alignment in Rac<sup>N17</sup> expressing embryos  
189 ( $\delta=0.15 \pm 0.06$ , Figure 2F-2H). Taken together, we propose that the selective filopodia adhesion  
190 in distinct CB subtypes plays a critical role in regulating CB matching.

### 191 **Candidate screening identified differential expression of Fas3 and Ten-m in the heart**

192 To identify the specific molecules that directly mediate the differential CB filopodia adhesion  
193 and cell matching, we performed a candidate-based screen. Candidate molecules (Figure S3A)



194 were selected using the following criteria: located at the cell surface; known to regulate cell-  
195 cell adhesion; and reported to mediate cell recognition and matching in other systems. We  
196 examined the expression of these candidates in the *Drosophila* heart - through immunostaining  
197 - to identify the ones showing differential expression in distinct CB subtypes. Neuroglian,  
198 Connectin, Fasciclin I and Fasciclin II have no detectable expression in the heart; Cadherins  
199 and Neurotactin are uniformly distributed throughout the CBs (Figure S3B-S3B’). In contrast,  
200 Fas3 and Ten-m show noticeable differential expression patterns within the *Drosophila* heart  
201 (Figures S3C and S3C’). Both Fas3 (Chiba et al., 1995; Kose et al., 1997; Snow et al., 1989)  
202 and Ten-m (Hong et al., 2012; Mosca, 2015) are reported to regulate synaptic target matching  
203 through promoting homophilic attraction. Further co-staining with Fas3 and Tin antibodies, we  
204 found that Fas3 is highly expressed in Tin-positive CBs (Figure 3A), while at a much lower  
205 level in Svp-positive CBs. Confirmed through co-staining in both wild-type and endogenous  
206 Ten-m::GFP tagged embryos (MiMIC-Ten-m::GFP) (Nagarkar-Jaiswal et al., 2015), Ten-m  
207 expression shows a complementary expression pattern to Fas3, with relatively higher  
208 expression in Svp-positive CBs than Tin-positive CBs (Figure 3B and Figures S3D and S3D’).

### 209 **Differential Fas3 expression level modulates filopodia adhesion in CBs**

210 The Fas3 expression pattern in the heart coincides with the differential CB filopodia binding  
211 affinity. We next examined more closely Fas3 expression and function. Fas3 is observed at the  
212 newly formed cell-cell junctions (Figure 3C), especially between Tin-positive CBs. Pools of  
213 Fas3 are found near the forming junctions, indicating potential active transport of Fas3 towards  
214 the cell leading edge to stabilize these contacts. Further, Fas3 localizes to the regions where  
215 filopodia contacts between contralateral matching CBs form (Figure 3C). Through exploring  
216 Fas3 expression during CB migration, we find that Fas3 expression is not only spatially but  
217 also temporally regulated during cardiogenesis (Figure S3E-S3H’). At Stage 14, there is no

218 obviously detectable Fas3 expression, but as the cells migrate toward the embryo midline, Fas3  
219 expression emerges and gets steadily higher with a differential expression pattern noticeable.  
220 In  $tin^{ABD}; tin^{346}/tin^{346}$  embryos, where Tin expression is depleted in the CBs during their  
221 migration (Zaffran, 2006), the differential expression of Fas3 is lost and the CB matching is  
222 dramatically affected (Figures S3I and S3I').

223 To test the role of Fas3 in CB matching - particularly in regulating selective filopodia binding  
224 activity - we performed *fas3* RNA interference (RNAi) in all CBs using Hand-Gal4, and Fas3  
225 overexpression in Svp-positive CBs using Svp-Gal4. Both *fas3* RNAi lines used ( $fas3^{RNAi-939}$   
226 and  $fas3^{RNAi-3091}$ ) efficiently decrease Fas3 expression in CBs (Figures 3D and 3E and Figure  
227 S4A). When Fas3 expression dramatically declines, the majority of CB filopodia contacts fail  
228 to stabilize (Figure 3F and Figures S4B and S4C and Movie S3 Middle), and show noticeably  
229 shorter filopodia binding time (averaged binding time=145s, with 8% persisting over 300s  
230 using  $fas3^{RNAi-3091}$ ; averaged binding time =150s with 15% persisting over 300s using  $fas3^{RNAi-939}$ ,  
231 Figure 3G and Figure S4D). In contrast, UAS- $fas3^{WT}$  driven by Svp-Gal4 markedly  
232 increases the Fas3 expression in Svp-positive cells (Figures 3D and 3H). Filopodia in the Svp-  
233 positive CBs with upregulated Fas3 expression show increased binding affinity, with contacts  
234 stabilizing and Moe::GFP accumulating (Figure 3I and Movie S4 Right). In these cells, the  
235 filopodia binding duration significantly increases (averaged binding time = 230s, with 30%  
236 persisting over 300s, Figure 3G). Further, the morphology of Svp-positive CBs is drastically  
237 changed, with significant cell expansion and large, long-lived protrusions, indicative of  
238 increased adhesion to neighboring cells (Figure 3I). These results reveal that the spatially  
239 varied Fas3 expression level is critical for differential filopodia adhesion between CBs.

240 We further noticed that decreasing the Fas3 expression level in CBs also changes their  
241 collective migratory behavior. CBs join with their contralateral partners through a 'buttoning'  
242 pattern, with Tin-positive CBs typically making initial contact (Figures 3J and 3L and Movie

243 S5 Left) (Swope et al., 2014). However, when Fas3 expression is reduced, the sequence of  
244 heart closure is reversed, with Svp-positive CBs contacting first with their contralateral  
245 partners (Figures 3K and 3L and Movie S5 Right). This suggests that Fas3 not only regulates  
246 filopodia binding activity but also the collective CB migration. As the epidermis above the CBs  
247 shows strong Fas3 expression (Figure S4E and S4E'), Fas3 may also be acting to guide CBs  
248 migration on the epidermal sheets, especially for Tin-positive CBs that have high Fas3  
249 expression. However, Fas3 is less critical in the migration of Svp-positive CBs, as their  
250 migration is less perturbed by reduction in Fas3 expression, suggesting that other molecules  
251 (potentially Ten-m) mediate the Svp-positive CB migration and fusion.

## 252 **Disruption of differential Fas3 expression pattern alters CB matching**

253 The Fas3 expression level determines the corresponding CB filopodia binding affinity.  
254 Therefore, its differential expression pattern in the heart should be critical for CB matching.  
255 To test this hypothesis, we generated various Fas3 expression patterns in the developing  
256 *Drosophila* heart using: *fas3* null mutant (Fas3<sup>E25</sup>) (Elkins et al., 1990); cell-specific *fas3* RNAi;  
257 and Fas3 overexpression (Figure 4A-4F). Down-regulating expression of Fas3 in Svp-positive  
258 CBs - thereby increasing the relative Fas3 expression difference between Tin- and Svp-positive  
259 CBs - does not significantly alter cell matching, with the cell boundaries remaining well-  
260 matched in the aorta domain ( $\delta=0.13\pm0.04$ , Figures 4B-4B''' and 4G). In Fas3<sup>E25</sup> embryos, we  
261 observed mismatched CB contacts more frequently (Figure 4C-4C'''), with a significant,  
262 though relatively small, increase in the cell mismatch ( $\delta=0.19\pm0.11$ , Figure 4G). We also  
263 noticed that in these embryos the CBs shape becomes more rounded, a phenotype reminiscent  
264 of Svp-positive CBs (Figures 4C'' and 4C'''). Next, we tested the reverse condition, where all  
265 the CBs have approximately equal level of Fas3, by increasing Fas3 expression in Svp-positive  
266 CBs (Figure 4D-4D'''). We found a slightly increased level of CB matching defects compared

267 to Fas3<sup>E25</sup> embryos ( $\delta=0.22\pm 0.06$ , Figures 4D'', 4D''' and 4G). Noticeably, Fas3  
268 overexpression leads to more angular (square-like) cell shapes in Svp-positive CBs (Figures  
269 4D'' and 4D'''). These Fas3 perturbation results confirm that the differential expression pattern  
270 of Fas3 is important for CB shape and precise matching.

271 To further challenge the matching capacity of CBs, we generated stochastic Fas3 expression  
272 patterns by taking advantage of the large cell-to-cell variability in activity of the Hand-Gal4  
273 driver (Figure S5A-S5C; see Supplementary Information for Hand-Gal4 activity). Crossing  
274 Hand-Gal4 with fas3<sup>RNAi</sup> created hearts with significant Fas3 intensity variation (Figure 4E-  
275 4E''' and Figures S5D and S5E). Under this condition, CB matching is dramatically perturbed  
276 and shows even larger mismatch than Fas3<sup>E25</sup> embryos ( $\delta_{\text{RNAi-3091}}=0.23\pm 0.08$ ,  $\delta_{\text{RNAi-939}}=0.22\pm 0.07$ ,  
277 Figures 4E''-4E''' and 4G and Figure S5F-S5H''). Moreover, we observed that  
278 within the same embryo, the subset of CBs with higher Fas3 expression tended to be larger and  
279 maintained a more angular shape, compared with cells having low Fas3 expression (Figure  
280 4E''' and Figures S5G'' and S5H''). This result gives further evidence of the important role of  
281 Fas3 for CB morphology and matching. However, despite the dramatically perturbed CB  
282 alignment in the above Fas3 perturbations, the highest cell mismatch is still observed in *svp*<sup>-</sup>  
283 embryos (Figure 4F-4G), which lose all the cell-type based matching mechanisms, indicating  
284 compensated matching mechanisms potentially exist.

### 285 **Low expression of Fas3 in Svp-positive CBs is necessary for robust heart morphogenesis**

286 Low, instead of null, Fas3 expression exists in Svp-positive CBs (Figure 5A-B''). To test  
287 whether low Fas3 expression level plays a role in cardiogenesis, we examined the Svp-positive  
288 CB matching in Svp>fas3<sup>RNAi</sup> embryos, where Fas3 expression in Svp-positive CBs is  
289 noticeably reduced (Figures 5C and 5C'). We observed a markedly increased Svp-positive CB  
290 contact defects in the heart domain (Figure 5A), where the Svp-positive CBs fail to make any

291 contact with their partners (Figure 5C'') in more than 20% of Svp>fas3<sup>RNAi</sup> embryos (17/74  
292 using fas3<sup>RNAi-3091</sup> and 11/40 using fas3<sup>RNAi-939</sup>), compared with wildtype embryos (8/84,  
293 p=0.02). Next, we tested the reverse condition by overexpressing Fas3 in the heart using UAS-  
294 fas3<sup>WT</sup> and Hand-Gal4 which results in particularly increased Fas3 expression in Tin-positive  
295 CBs (Figures S6A and S6A'). When this over-expression was especially marked in the heart  
296 domain, we observed similar Svp-positive CB contact defects (Figure D-D''), but with even  
297 higher frequency (24/78). In contrast, overexpression of Fas3 specifically in Svp-positive CBs  
298 shows comparable defect frequency (8/78) to wild-type embryos. In the heart domain, contacts  
299 between contralateral Svp-positive CBs are typically narrower (contralateral contact  
300 length=1.7±0.5µm) than the ones in the aorta domain (contralateral contact length=3.2±0.4µm)  
301 (Figure S6B). As the filopodia in CBs can reach up to ~5µm, the diagonally opposite Tin-  
302 positive CBs neighboring Svp-positive CBs are able to make crossover contacts in the heart  
303 domain (Figures 5E and 5F and Movie S6). In normal condition, these crossover contacts rarely  
304 stabilize (Figure 5F and Movie S6). Hence, we propose that the basal Fas3 expression in Svp-  
305 positive CBs may act to inhibit the stabilization of these crossover contacts through mediating  
306 filopodia binding competition (Figures 5E) and therefore ensure robust heart morphogenesis.  
307 Combined, these results suggest that the low expression of Fas3 in Svp-positive CBs is  
308 necessary and the expression difference between Tin-positive CBs and Svp-positive CBs needs  
309 to be precisely regulated.

### 310 **Ten-m works complementarily with Fas3 to ensure robust CB matching**

311 Our above results suggest redundancy or complementary matching mechanisms to Fas3 exist  
312 to ensure robust cell matching in the heart. As shown through our candidate screening, Ten-m  
313 has complementary differential expression to Fas3 in *Drosophila* heart, with higher expression  
314 in Svp-positive CBs (Figure 3B). We next examine the expression and functional relationships

315 between Ten-m and Fas3 in detail. Fas3 staining in MiMIC Ten-m::GFP embryos, confirmed  
316 the reversed expression pattern of Ten-m and Fas3 in the heart (Figure 6A-6B’). At the  
317 interface between the contralateral CBs, we found that Ten-m and Fas3 are expressed at high  
318 levels in distinct domains, with few exceptions showing either both high or low levels of both  
319 Ten-m and Fas3 (Figure 6C).

320 In contrast to Fas3, Ten-m is not only found in the CBs but also in the surrounding pericardial  
321 cells (Figures 6A’ and 6B’’) and shows much earlier expression in CBs (Figure S6A-S6B’’),  
322 with transcriptional activity reported at Stage 12 (Baumgartner et al., 1994). Compared to Fas3,  
323 Ten-m expression in the epidermis is more localized, and, strikingly, these regions correspond  
324 to the locations above Svp-positive CBs (Figure S6C-S6C’). Potentially, Ten-m plays a role in  
325 mediating Svp-positive CBs migration through providing an adhesive environment, especially  
326 in embryos with reduced levels of Fas3 in the CBs. This gives an explanation of the reversal in  
327 the collective migration pattern of CBs observed in *Hand>fas3<sup>RNAi</sup>* embryos (Figure 3K).

328 If Ten-m and Fas3 are acting as complementary mechanisms to ensure robust CB  
329 morphogenesis, their expression patterns should be independent from each other within CBs;  
330 *i.e.* losing one does not affect the differential expression of the other. To test this, we checked  
331 Ten-m expression in *fas3<sup>-</sup>* mutants and Fas3 expression in Ten-m null embryos (Ten-m [5309])  
332 (Levine et al., 1994). As expected, loss of one factor does not change the other’s expression  
333 pattern (Figure 6D-6E’).

334 To test whether Ten-m and Fas3 are working in concert to ensure robust CB matching, we first  
335 examined the cell arrangement and alignment in Ten-m null embryos. In contrast to *fas3<sup>-</sup>*  
336 embryos, we observed significant defects in CB arrangements in *ten-m<sup>-</sup>* embryos, even during  
337 CBs migration stages, with the 4-2 pattern of Tin- and Svp-positive CBs perturbed (n=65/87  
338 in *ten-m<sup>-</sup>*, n=16/59 in *fas3<sup>-</sup>*, Figure S6D-S6F’). This indicates the early expression of Ten-m  
339 in CBs may have an important role in regulating CBs arrangement, potentially through guiding

340 CBs migration at Stage 13-15 (Raza and Jacobs, 2016) or even affecting progenitor CBs fate  
341 determination by ensuring correct division orientation during progenitor CB division at Stage  
342 12 (Tao and Schulz, 2007; Ward and Skeath, 2000). To assess the cell matching defects caused  
343 by loss of Ten-m function, we analyzed only mutant embryos with cell arrangement patterns  
344 comparable to wildtype. Similar to *fas3*<sup>-</sup> mutants, loss of Ten-m causes partial reduction in the  
345 efficacy of CB matching (Figure 6F-6F') with the cell mismatch ( $\delta=0.21\pm0.06$ ) still  
346 significantly lower than *svp*<sup>-</sup> embryos (Figure 6G). Next, we abolished the expression of both  
347 Ten-m and Fas3 in double mutant embryos. These embryos showed severe defects in CBs  
348 matching with loss of straight boundaries between CB subtypes (Figure 6H-6H'), reminiscent  
349 of *svp*<sup>-</sup> embryos. Quantifying this mismatch, we found CB mismatch is comparable to *svp*<sup>-</sup>  
350 embryos ( $\delta_{DM}=0.27\pm0.10$ , Figure 6G).

351 These results support our hypothesis that Fas3 and Ten-m are working complementarily to  
352 ensure robust CB matching. Under normal conditions, both Fas3 and Ten-m are regulating cell  
353 matching based on their own differential expression pattern (Figure 6I top). The loss of one is  
354 compensated by the other, which can still partially function to retain the proper cell alignment  
355 (Figure 6I middle). However, when both Fas3 and Ten-m are lost or equally distributed in the  
356 heart, CBs dramatically lose the ability to perform active cell matching (Figure 6I bottom),  
357 resulting in severe cardiac misalignment.

## 358 **Discussion**

359 Precise and robust cell matching is widely required in multicellular organisms and various  
360 components have been identified that regulate cell matching (Davenport et al., 1993; Eilken  
361 and Adams, 2010; Jacinto et al., 2000; Mossey et al., 2009; Tessier-Lavigne and Goodman,  
362 1996). However, the underlying mechanisms of cell matching, especially with regard to  
363 dynamics, remain to be elucidated. Here, we reveal that precise and robust CB matching is

364 mediated by filopodia selective binding activity in distinct cell types and the related  
365 complementary differential expressions of the cell-cell adhesion molecules Fas3 and Ten-m  
366 (Figure 7). As both Fas3 and Ten-m promote homophilic adhesion (Chiba et al., 1995; Hong  
367 et al., 2012; Kose et al., 1997; Mosca, 2015; Snow et al., 1989), we propose that Fas3 and Ten-  
368 m instruct robust CB matching through regulating filopodia binding activities, potentially in a  
369 competition manner: in wildtype, Tin-positive CBs with high expression of Fas3 lead the heart  
370 matching and form stronger filopodia binding with their partner cells, while their filopodia can  
371 also reach the matching regions between Svp-positive CBs and disrupt those CBs' filopodia  
372 adhesion, thus creating a differential adhesion affinity and instructing precise matching (Figure  
373 7A); however, in *Hand>fas3<sup>RNAi</sup>* embryos, where Fas3 in CBs are significantly reduced, the  
374 Svp-positive CBs expressing relatively higher Ten-m become the leader cells and their  
375 filopodia are able to form relatively stronger adhesions without the interference from the Tin-  
376 positive CBs that lag behind, thus retaining the partial cell matching (Figure 7B).

377 During development, filopodia activity regulates proper cell matching of multiple processes  
378 (Davenport et al., 1993; Eilken and Adams, 2010; Jacinto et al., 2000; Tessier-Lavigne and  
379 Goodman, 1996). In particular, similar selective filopodia stabilization of developing synapses  
380 has also been shown to be important for specific circuit formation (Changeux and Danchin,  
381 1976; Özel et al., 2015; Trachtenberg et al., 2002). Furthermore, the differential expression of  
382 cell adhesive molecules has been widely used to explain the formation of cell-cell connections  
383 in many tissues, including cell sorting (Amack and Manning, 2012; Fraser, 1980; Gilbert, 2007;  
384 Schwabe et al., 2014; Steinberg, 1963). Yet, the link between filopodia activity and differential  
385 adhesion - and the subsequent dynamic regulation of cell matching - remains unclear. Here, we  
386 have shown that these two components are tightly linked to instruct cell matching and  
387 organization; cell specific differential adhesion controls the selective binding of filopodia and  
388 thus drives the cells to their correct partners and helps in forming precise cell-cell connections.



389 This provides a simple and efficient matching mechanism that could be generally applicable.  
390 For example, in angiogenesis new blood vessel formation involves initial sprouting and  
391 rebuilding of connections between blood vessel cells (Adams and Alitalo, 2007); yet, how these  
392 cells form precise cell-cell connections remains poorly understood. We propose that blood  
393 vessel cells may utilize filopodia selective adhesion to sense the surrounding cellular  
394 environment and specifically adhere with their partner cells based on the differential expression  
395 of certain cell-cell adhesive molecules.

396 Functional redundancy is a fundamental principle in building robust biological systems  
397 (Hiroaki Kitano, 2004; Masel and Siegal, 2009; Turrigiano, 1999). Here we identify Fas3 and  
398 Ten-m as regulating CBs matching in a complementary fashion. Their spatial and temporal  
399 expression patterns in CBs appear to be precisely regulated and the degree of adhesion  
400 difference is carefully balanced. During neurogenesis, numerous molecules have been  
401 identified in guiding cell targeting (Shen and Cowan, 2010; Tessier-Lavigne and Goodman,  
402 1996), and potential complementarity has been demonstrated (Winberg et al., 1998). In other  
403 multicellular systems, like neural crest formation (Sauka-Spengler and Bronner-Fraser, 2008),  
404 the expression of multiple selective adhesive molecules in different sub-locations is common,  
405 and their spatial-temporal regulation is precisely mediated (Gilbert, 2007; Takeichi, 1988;  
406 Williams and Barclay, 1988). Combined, we propose that precisely regulated differential  
407 adhesion and matching redundancy is an efficient mechanism for ensuring robust cell-cell  
408 connection formation.

409 Although we have revealed how active *Drosophila* CB matching is driven by selective  
410 filopodia adhesion, there are a number of open questions. First, how exactly does Fas3 regulate  
411 the filopodia binding activity? Is it a simple mechanical process based on homophilic binding,  
412 or are further downstream interactions, in particular cytoskeleton remodeling and active  
413 adhesion molecule transportation, also involved? Fas3 is likely containing four N-linked

414 glycosylation sites and two phosphorylation sites (Snow et al., 1989), which potentially enables  
415 complex regulation after initial filopodia contact. Cdc42 is presumably involved in such  
416 processes, but exactly how is still unclear. Second, what is the regulation mechanism of Ten-  
417 m and how are these different interactions between filopodia with Fas3 and Ten-m tuned to  
418 ensure robust CB matching? Ten-m belongs to the Teneurins, which are conserved throughout  
419 Animalia and are related to neuron structures, functions and diseases (Antinucci et al., 2013;  
420 Hong et al., 2012; Sklar et al., 2011; Tucker and Chiquet-Ehrismann, 2006). Ten-m facilitates  
421 neuron recognition through differentiating between simultaneous homo- and heterophilic  
422 interactions (Hong et al., 2012; Mosca, 2015). The downstream effectors of Ten-m and its  
423 relationship with Fas3 constitute interesting avenues for further investigations. We believe that  
424 future studies on the CB matching process of *Drosophila* heart will shed light on these common  
425 challenges in cell matching.

#### 426 **Author Contributions**

427 S.Z. and T.E.S. designed the project. S.Z. performed the experiments with assistance and  
428 advices from C.A.. S.Z. performed the data quantification. All authors analyzed and interpreted  
429 the data. All authors contributed to writing the manuscript.

#### 430 **Acknowledgments**

431 We thank Manfred Frasch, Rolf Bodmer, Stefan Baumgartner, Zhe Han and Yusuke Toyama  
432 for sharing fly lines and reagents. We acknowledge Paul Matsudaira, Yusuke Toyama, Ronen  
433 Zaidel-Bar, Zhe Han, Adrian Moore and all Saunders' lab members for fruitful discussions and  
434 comments on the manuscript. This work was supported by the National Research Foundation  
435 Singapore under an NRF Fellowship to T.E.S. (NRF2012NRF-NRFF001-094).

436 **References**

- 437 Adams, R.H., and Alitalo, K. (2007). Molecular regulation of angiogenesis and  
438 lymphangiogenesis. *Nat. Rev. Mol. Cell Biol.* 8, 464–478.
- 439 Amack, J.D., and Manning, M.L. (2012). Knowing the Boundaries: Extending the Differential  
440 Adhesion Hypothesis in Embryonic Cell Sorting. *Science.* 338, 212–215.
- 441 Antinucci, P., Nikolaou, N., Meyer, M.P., and Hindges, R. (2013). Teneurin-3 specifies  
442 morphological and functional connectivity of retinal ganglion cells in the vertebrate visual  
443 system. *Cell Rep.* 5, 582–592.
- 444 Baumgartner, S., Martin, D., Hagios, C., and Chiquet-Ehrismann, R. (1994). Tenm, a  
445 *Drosophila* gene related to tenascin, is a new pair-rule gene. *EMBO J.* 13, 3728–3740.
- 446 Bodmer, R. (1995). Bodmer 1995 *Drosophila* heart development and its relationship to  
447 vertebrates. *Trends Cardiovasc. Med.* 5, 21–28.
- 448 Bodmer, R., and Frasch, M. (2010). *Heart Development and Regeneration.*
- 449 Changeux, J.P., and Danchin, A. (1976). Selective stabilisation of developing synapses as a  
450 mechanism for the specification of neuronal networks. *Nature* 264, 705–712.
- 451 Chiba, A., Snow, P., Keshishian, H., and Hotta, Y. (1995). Fasciclin III as a synaptic target  
452 recognition molecule in *Drosophila*. *Nature* 374, 166–168.
- 453 Davenport, R.W., Dou, P., Rehder, V., and Kater, S.B. (1993). A sensory role for neuronal  
454 growth cone filopodia. *Nature* 361, 721–724.
- 455 Dixon, M.J., Marazita, M.L., Beaty, T.H., and Murray, J.C. (2011). Cleft lip and palate:  
456 understanding genetic and environmental influences. *Nat. Rev. Genet.* 12, 167–178.
- 457 Edwards, K.A., Demsky, M., Montague, R.A., Weymouth, N., and Kiehart, D.P. (1997). GFP-  
458 moesin illuminates actin cytoskeleton dynamics in living tissue and demonstrates cell shape

- 459 changes during morphogenesis in *Drosophila*. *Dev. Biol.* *191*, 103–117.
- 460 Eilken, H.M., and Adams, R.H. (2010). Dynamics of endothelial cell behavior in sprouting  
461 angiogenesis. *Curr. Opin. Cell Biol.* *22*, 617–625.
- 462 Elkins, T., Zinn, K., Mcallister, L., Hoffmann, F.M., and Goodman, C.S. (1990). Genetic  
463 Analysis of a *Drosophila* Neural Cell Adhesion Moleculuk : Interaction of Fasciclin I and  
464 Abelson Tymsine Kinase Mutations. *60*, 565–575.
- 465 Fraser, S.E. (1980). A differential adhesion approach to the patterning of nerve connections.  
466 *Dev. Biol.* *79*, 453–464.
- 467 Gilbert, S. (2007). *Developmental Biology*. *Dev. Biol.* *311*, 691.
- 468 Goodman, C.S., and Shatz, C.J. (1993). Developmental mechanisms that generate precise  
469 patterns of neuronal connectivity. *Cell* *72*, 77–98.
- 470 Haack, T., Schneider, M., Schwendele, B., and Renault, A.D. (2014). *Drosophila* heart cell  
471 movement to the midline occurs through both cell autonomous migration and dorsal closure.  
472 *Dev. Biol.* *396*, 169–182.
- 473 Hall, A. (1998). Rho GTPases and the Actin Cytoskeleton. *Science.* *279*, 509–514.
- 474 Han, Z. (2006). Hand, an evolutionarily conserved bHLH transcription factor required for  
475 *Drosophila* cardiogenesis and hematopoiesis. *Development* *133*, 1175–1182.
- 476 Hiroaki Kitano (2004). Biological robustness. *Nat. Rev. Genet.* *5*, 9–9.
- 477 Hong, W., Mosca, T.J., and Luo, L. (2012). Teneurins instruct synaptic partner matching in an  
478 olfactory map. *Nature* *484*, 201–207.
- 479 Hua, J.Y., and Smith, S.J. (2004). Neural activity and the dynamics of central nervous system  
480 development. *Nat. Neurosci.* *7*, 327–332.
- 481 Jacinto, A., Wood, W., Balayo, T., Turmaine, M., Martinez-Arias, A., and Martin, P. (2000).

- 482 Dynamic actin-based epithelial adhesion and cell matching during *Drosophila* dorsal closure.  
483 *Curr. Biol.* *10*, 1420–1426.
- 484 Katz, L.C., and Shatz, C.J. (1996). Synaptic Activity and the Construction of Cortical Circuits.  
485 *Science.* *274*, 1133–1138.
- 486 Kose, H., Rose, D., Zhu, X., and Chiba, A. (1997). Homophilic synaptic target recognition  
487 mediated by immunoglobulin-like cell adhesion molecule Fasciclin III. *Development* *124*,  
488 4143–4152.
- 489 Lehmacher, C., Abeln, B., and Paululat, A. (2012). The ultrastructure of *Drosophila* heart cells.  
490 *Arthropod Struct. Dev.* *41*, 459–474.
- 491 Levine, A., Bashan-Ahrend, A., Budai-Hadrian, O., Gartenberg, D., Menasherow, S., and  
492 Wides, R. (1994). odd Oz: A novel *Drosophila* pair rule gene. *Cell* *77*, 587–598.
- 493 Lo, P.C.H., and Frasch, M. (2001). A role for the COUP-TF-related gene seven-up in the  
494 diversification of cardioblast identities in the dorsal vessel of *Drosophila*. *Mech. Dev.* *104*, 49–  
495 60.
- 496 Luo, L., Joyce Liao, Y., Jan, L.Y., and Jan, Y.N. (1994). Distinct morphogenetic functions of  
497 similar small GTPases: *Drosophila* Drac1 is involved in axonal outgrowth and myoblast fusion.  
498 *Genes Dev.* *8*, 1787–1802.
- 499 Maness, P.F., and Schachner, M. (2007). Neural recognition molecules of the immunoglobulin  
500 superfamily: signaling transducers of axon guidance and neuronal migration. *Nat. Neurosci.*  
501 *10*, 19–26.
- 502 Maragoudakis, M.E. (2000). Angiogenesis in health and disease. *Gen. Pharmacol. Vasc. Syst.*  
503 *35*, 225–226.
- 504 Martin, P. (1997). Wound Healing--Aiming for Perfect Skin Regeneration. *Science.* *276*, 75–

505 81.

506 Masel, J., and Siegal, M.L. (2009). Robustness: mechanisms and consequences. *Trends Genet.*  
507 *25*, 395–403.

508 Mattila, P.K., and Lappalainen, P. (2008). Filopodia: molecular architecture and cellular  
509 functions. *Nat. Rev. Mol. Cell Biol.* *9*, 446–454.

510 Medioni, C., Sénatore, S., Salmand, P.A., Lalevée, N., Perrin, L., and Sémériva, M. (2009).  
511 The fabulous destiny of the *Drosophila* heart. *Curr. Opin. Genet. Dev.* *19*, 518–525.

512 Molina, M.R., and Cripps, R.M. (2001). Ostia, the inflow tracts of the *Drosophila* heart,  
513 develop from a genetically distinct subset of cardial cells. *Mech. Dev.* *109*, 51–59.

514 Mosca, T.J. (2015). On the Teneurin track: a new synaptic organization molecule emerges.  
515 *Front. Cell. Neurosci.* *9*, 1–14.

516 Mossey, P.A., Little, J., Munger, R.G., Dixon, M.J., and Shaw, W.C. (2009). Cleft lip and  
517 palate. *Lancet* *374*, 1773–1785.

518 Nagarkar-Jaiswal, S., Lee, P.T., Campbell, M.E., Chen, K., Anguiano-Zarate, S., Gutierrez,  
519 M.C., Busby, T., Lin, W.W., He, Y., Schulze, K.L., et al. (2015). A library of MiMICs allows  
520 tagging of genes and reversible, spatial and temporal knockdown of proteins in *Drosophila*.  
521 *Elife* *2015*, 1–28.

522 Özel, M.N., Langen, M., Hassan, B.A., and Hiesinger, P.R. (2015). Filopodial dynamics and  
523 growth cone stabilization in *Drosophila* visual circuit development. *Elife* *4*, 1–21.

524 Pfeiffer, B.D., Jenett, A., Hammonds, A.S., Ngo, T.-T.B., Misra, S., Murphy, C., Scully, A.,  
525 Carlson, J.W., Wan, K.H., Laverly, T.R., et al. (2008). Tools for neuroanatomy and  
526 neurogenetics in *Drosophila*. *Proc. Natl. Acad. Sci.* *105*, 9715–9720.

527 Ponzielli, R., Astier, M., Chartier, A., Gallet, A., Théron, P., and Sémériva, M. (2002). Heart

528 tube patterning in *Drosophila* requires integration of axial and segmental information provided  
529 by the Bithorax Complex genes and hedgehog signaling. *Development* 129, 4509–4521.

530 Raza, Q., and Jacobs, J.R. (2016). Guidance signalling regulates leading edge behaviour during  
531 collective cell migration of cardiac cells in *Drosophila*. *Dev. Biol.* 419, 285–297.

532 Sauka-Spengler, T., and Bronner-Fraser, M. (2008). A gene regulatory network orchestrates  
533 neural crest formation. *Nat. Rev. Mol. Cell Biol.* 9, 557–568.

534 Schwabe, T., Borycz, J.A., Meinertzhagen, I.A., and Clandinin, T.R. (2014). Differential  
535 adhesion determines the organization of synaptic fascicles in the *drosophila* visual system. *Curr.*  
536 *Biol.* 24, 1304–1313.

537 Shen, K., and Cowan, C.W. (2010). Guidance molecules in synapse formation and plasticity.  
538 *Cold Spring Harb. Perspect. Biol.* 2. a001842

539 Shinbane, J.S., Wood, M.A., Jensen, D.N., Ellenbogen, K.A., Fitzpatrick, A.P., and Scheinman,  
540 M.M. (1997). Tachycardia-induced cardiomyopathy: A review of animal models and clinical  
541 studies. *J. Am. Coll. Cardiol.* 29, 709–715.

542 Sklar, P., Ripke, S., Scott, L.J., Andreassen, O.A., Cichon, S., Craddock, N., Edenberg, H.J.,  
543 Nurnberger, J.I., Rietschel, M., Blackwood, D., et al. (2011). Large-scale genome-wide  
544 association analysis of bipolar disorder identifies a new susceptibility locus near ODZ4. *Nat.*  
545 *Genet.* 43, 977–983.

546 Snow, P.M., Bieber, A.J., and Goodman, C.S. (1989). Fasciclin III: A novel homophilic  
547 adhesion molecule in *Drosophila*. *Cell* 59, 313–323.

548 Srivastava, D., and Olson, E.N. (2000). A genetic blueprint for cardiac development. *Nature*  
549 407, 221–226.

550 Steinberg, M.S. (1963). Reconstruction of Tissues by Dissociated Cells. *Science.* 141, 401–

551 408.

552 Swope, D., Kramer, J., King, T.R., Cheng, Y.S., and Kramer, S.G. (2014). Cdc42 is required  
553 in a genetically distinct subset of cardiac cells during *Drosophila* dorsal vessel closure. *Dev.*  
554 *Biol.* 392, 221–232.

555 Takeichi, M. (1987). Cadherins: a molecular family essential for selective cell-cell adhesion  
556 and animal morphogenesis. *Trends Genet.* 3, 213–217.

557 Takeichi, M. (1988). The cadherins: cell-cell adhesion molecules controlling animal  
558 morphogenesis. *Development* 102, 639–655.

559 Tao, Y., and Schulz, R.A. (2007). Heart development in *Drosophila*. *Semin. Cell Dev. Biol.*  
560 18, 3–15.

561 Tessier-Lavigne, M., and Goodman, C.S. (1996). *The Molecular Biology of Axon Guidance.*  
562 *Science.* 274, 1123–1133.

563 Trachtenberg, J.T., Chen, B.E., Knott, G.W., Feng, G., Sanes, J.R., Welker, E., and Svoboda,  
564 K. (2002). Long-term in vivo imaging of experience-dependent synaptic plasticity in adult  
565 cortex. *Nature* 420, 788–794.

566 Tucker, R.P., and Chiquet-Ehrismann, R. (2006). Teneurins: A conserved family of  
567 transmembrane proteins involved in intercellular signaling during development. *Dev. Biol.* 290,  
568 237–245.

569 Turrigiano, G.G. (1999). Homeostatic plasticity in neuronal networks: The more things change,  
570 the more they stay the same. *Trends Neurosci.* 22, 221–227.

571 Umana, E., Solares, C.A., and Alpert, M.A. (2003). Tachycardia-induced cardiomyopathy. *Am.*  
572 *J. Med.* 114, 51–55.

573 Vogler, G., and Bodmer, R. (2015). Cellular Mechanisms of *Drosophila* Heart Morphogenesis.



- 574 J. Cardiovasc. Dev. Dis. 2, 2–16.
- 575 Vogler, G., Liu, J., Iafe, T.W., Migh, E., Mihály, J., and Bodmer, R. (2014). Cdc42 and formin  
576 activity control non-muscle myosin dynamics during *Drosophila* heart morphogenesis. *J. Cell*  
577 *Biol.* 206, 909–922.
- 578 Ward, E.J., and Skeath, J.B. (2000). Characterization of a novel subset of cardiac cells and their  
579 progenitors in the *Drosophila* embryo. *Development* 127, 4959–4969.
- 580 Williams, A.F., and Barclay, A.N. (1988). The Immunoglobulin Superfamily—Domains for  
581 Cell Surface Recognition. *Annu. Rev. Immunol.* 6, 381–405.
- 582 Winberg, M.L., Mitchell, K.J., and Goodman, C.S. (1998). Genetic analysis of the mechanisms  
583 controlling target selection: Complementary and combinatorial functions of netrins,  
584 semaphorins, and IgCAMs. *Cell* 93, 581–591.
- 585 Woolf, C.J. (2000). Neuronal Plasticity: Increasing the Gain in Pain. *Science.* 288, 1765–1768.
- 586 Xu, T., Yu, X., Perlik, A.J., Tobin, W.F., Zweig, J.A., Tennant, K., Jones, T., and Zuo, Y.  
587 (2009). Rapid formation and selective stabilization of synapses for enduring motor memories.  
588 *Nature* 462, 915–919.
- 589 Zaffran, S. (2006). Cardioblast-intrinsic Tinman activity controls proper diversification and  
590 differentiation of myocardial cells in *Drosophila*. *Development* 133, 4073–4083.

591 **Figures**

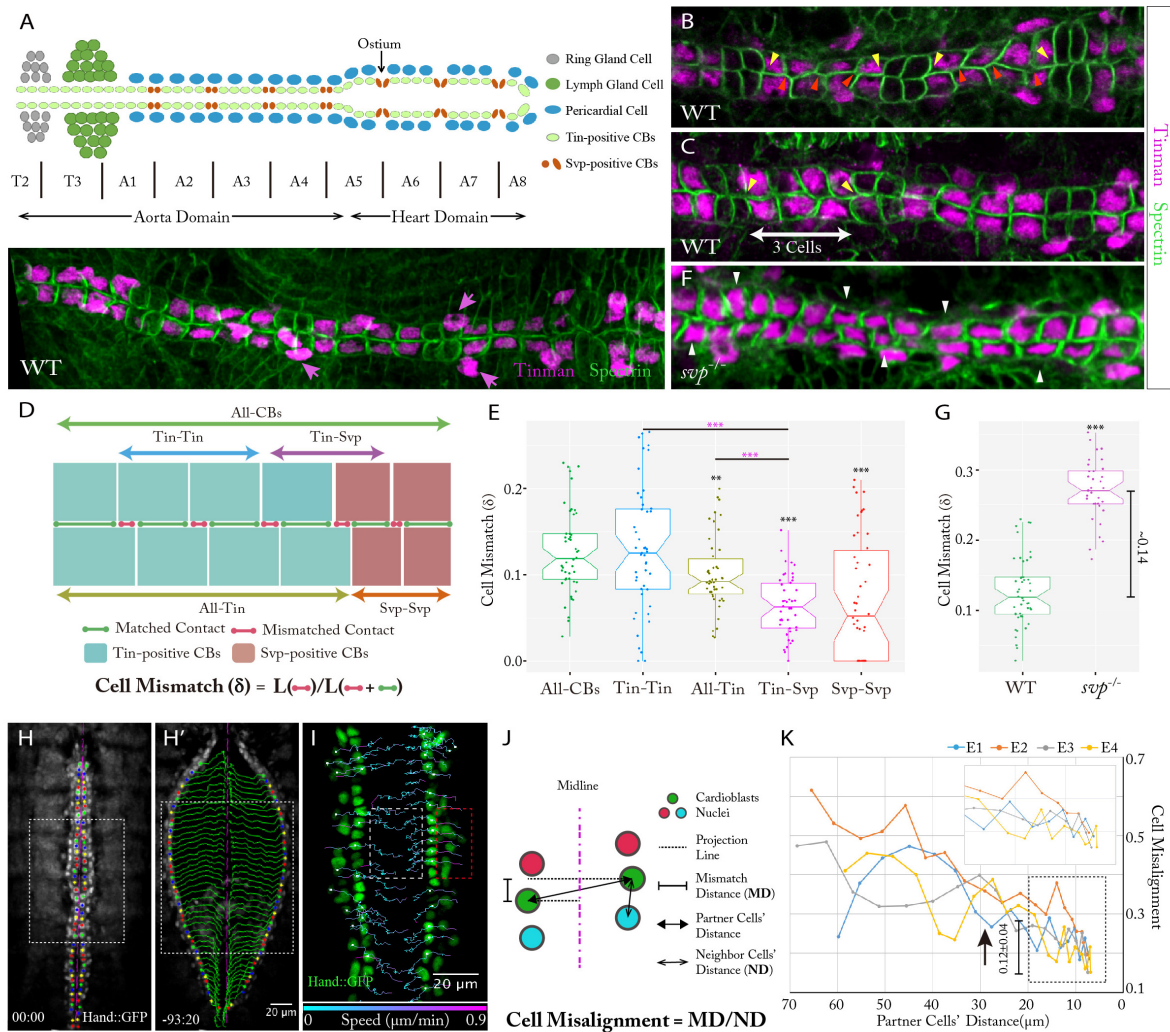

592

593 **Figure 1. Active *Drosophila* CB matching is cell-type specific and short-ranged**

594 (A) Top: Schematic representation of the *Drosophila* heart structure. Bottom: Immunostaining  
 595 of the heart vessel with Tin and Spectrin at Stage 17. Pink arrows point to the Tin-positive  
 596 pericardial cells. (B-C) CB membrane contacts in wildtype embryos at Stage 16. Yellow and  
 597 red arrowheads point to examples of matched and mismatched membrane contacts. In (C) one  
 598 of the cardiac segments has reduced Tin-positive CB number. (D) Schematic of cell mismatch  
 599 definition ( $\delta$ ) between contralateral CBs. (E) Quantification of cell mismatch ( $\delta$ ) between  
 600 different CBs in wildtype embryos (n=47). Data are presented as boxplot and scatter plot

601 (\*P<0.05, \*\*P<0.01, \*\*\*P<0.001, ‘\*’ - compared with ‘Overall’ contacts, ‘\*’ -compared with  
602 ‘Tin-Tin’ contacts). (F) Immunostaining of the heart vessel with Tin and Spectrin at Stage 17  
603 in *svp*<sup>-</sup> embryos. White arrowheads point to the cells with exaggerated mismatch to their  
604 contralateral neighbor. (G) Cell mismatch ( $\delta$ ) analysis of wildtype (n=47) and *svp*<sup>-</sup> (n=34)  
605 embryos. Data are presented as boxplot and scatter plot (\*P<0.05, \*\*P<0.01, \*\*\*P<0.001). (H)  
606 Identification of contralateral cell partners (same color) at stage 16 in embryos expressing  
607 Hand::GFP. (H’) Cell tracking of same embryo as (H), with green lines showing the CB  
608 migration. (I) Individual CB cell tracking with shorter interval time (see also Figure S1E;  
609 Movie S2) before (red box) and after (white box) dorsal closure finishing with migration traces  
610 color-coded by migration speed. (J) Schematic of cell misalignment measurement during CB  
611 migration. (K) Quantification of the cell misalignment during CB migration (in region denoted  
612 by white boxes in H-J) (n=4). Inset is enlarged region highlighting cell matching at separations  
613 of <20  $\mu$ m. Black arrow points to the rough time of dorsal closure finishing.

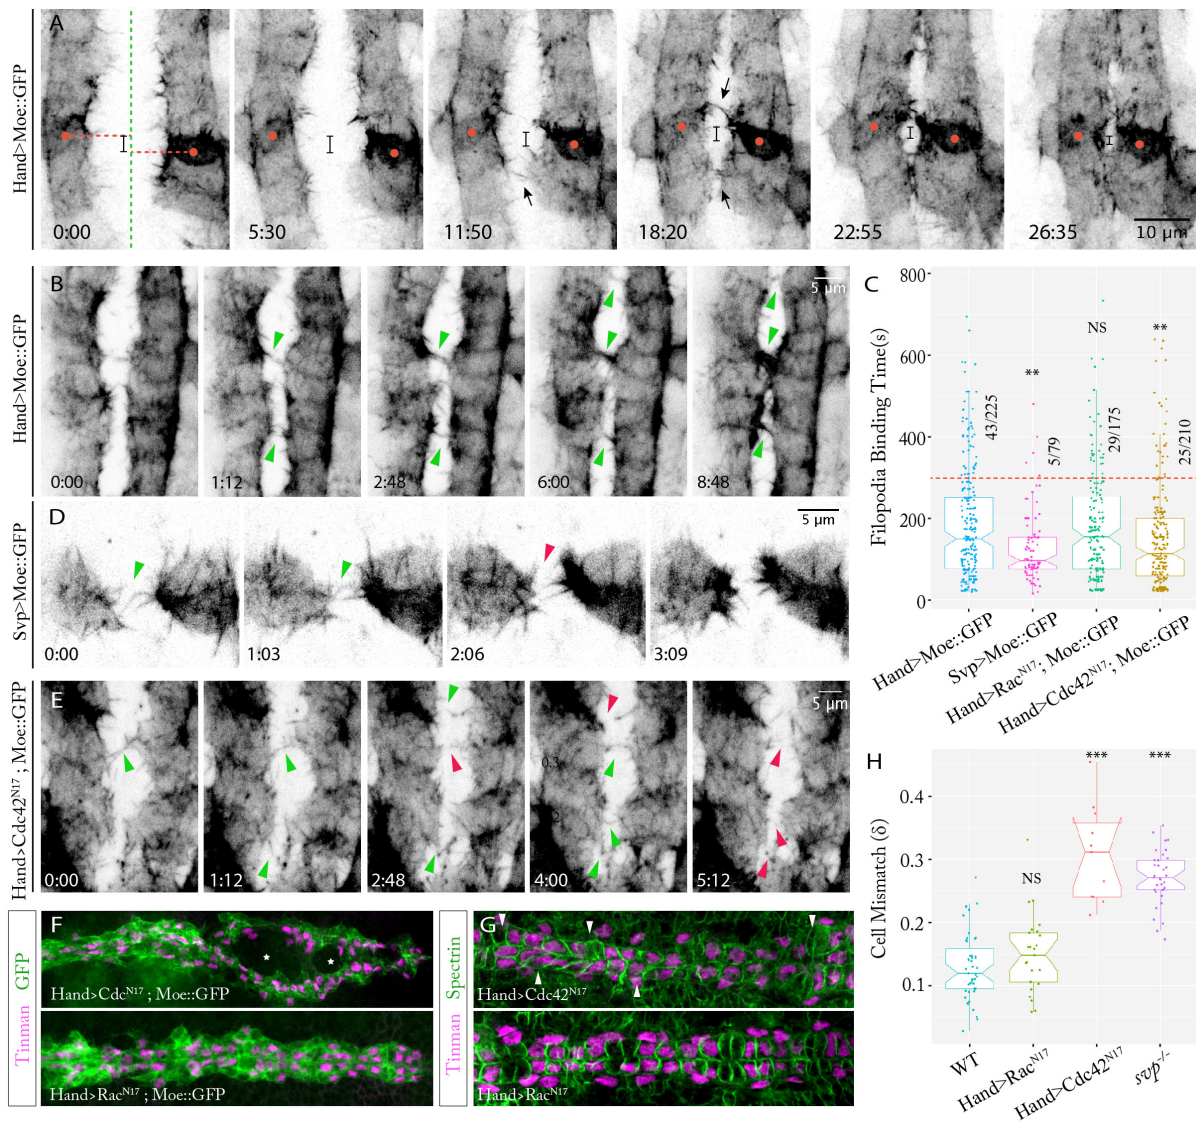

614

615 **Figure 2. CB filopodia drive cell matching through differential binding affinity in distinct**  
 616 **CB subtypes**

617 (A-B) CB filopodia activity in Hand>Moe::GFP embryos. In (A) black bar denotes  
 618 contralateral partner cell (denoted by red dots) along the midline (green line) offset during  
 619 migration (see also Movie S3 Left). (C) Quantification of filopodia binding time under different  
 620 conditions. Data are presented as boxplot and scatter plot ( $n > 70$  per condition) (\* $P < 0.05$ ,  
 621 \*\* $P < 0.01$ , \*\*\* $P < 0.001$ , NS: Not Significant, compared with Hand>Moe::GFP condition), red  
 622 line corresponds to 300s binding time. (D) Filopodia activity in a Svp>Moe::GFP embryo (see  
 623 also Movie S4 Left). (E) Filopodia binding activity in Hand>Cdc42<sup>N17</sup>; Moe::GFP embryo (see

624 also Movie S3 Right). (B, D, E) Green and red arrowheads point to reinforced and transient  
625 filopodia adhesions respectively. (F) Heart morphology in Hand>Cdc42<sup>N17</sup> (top) and  
626 Hand>Rac<sup>N17</sup> (bottom) embryos (both expressing Moe::GFP) at stage 16. Asterisks label  
627 unclosed gaps between contralateral sides. (G) CB alignment in Hand>Cdc42<sup>N17</sup> (top) and  
628 Hand>Rac<sup>N17</sup> (bottom) embryos. White arrowheads point to the cells with exaggerated  
629 mismatch. (H) CB mismatch ( $\delta$ ) quantification in different conditions. Data are presented as  
630 boxplot and scatter plot (n>5 per condition) (\*P<0.05, \*\*P<0.01, \*\*\*P<0.001, NS: Not  
631 Significant, compared with WT).

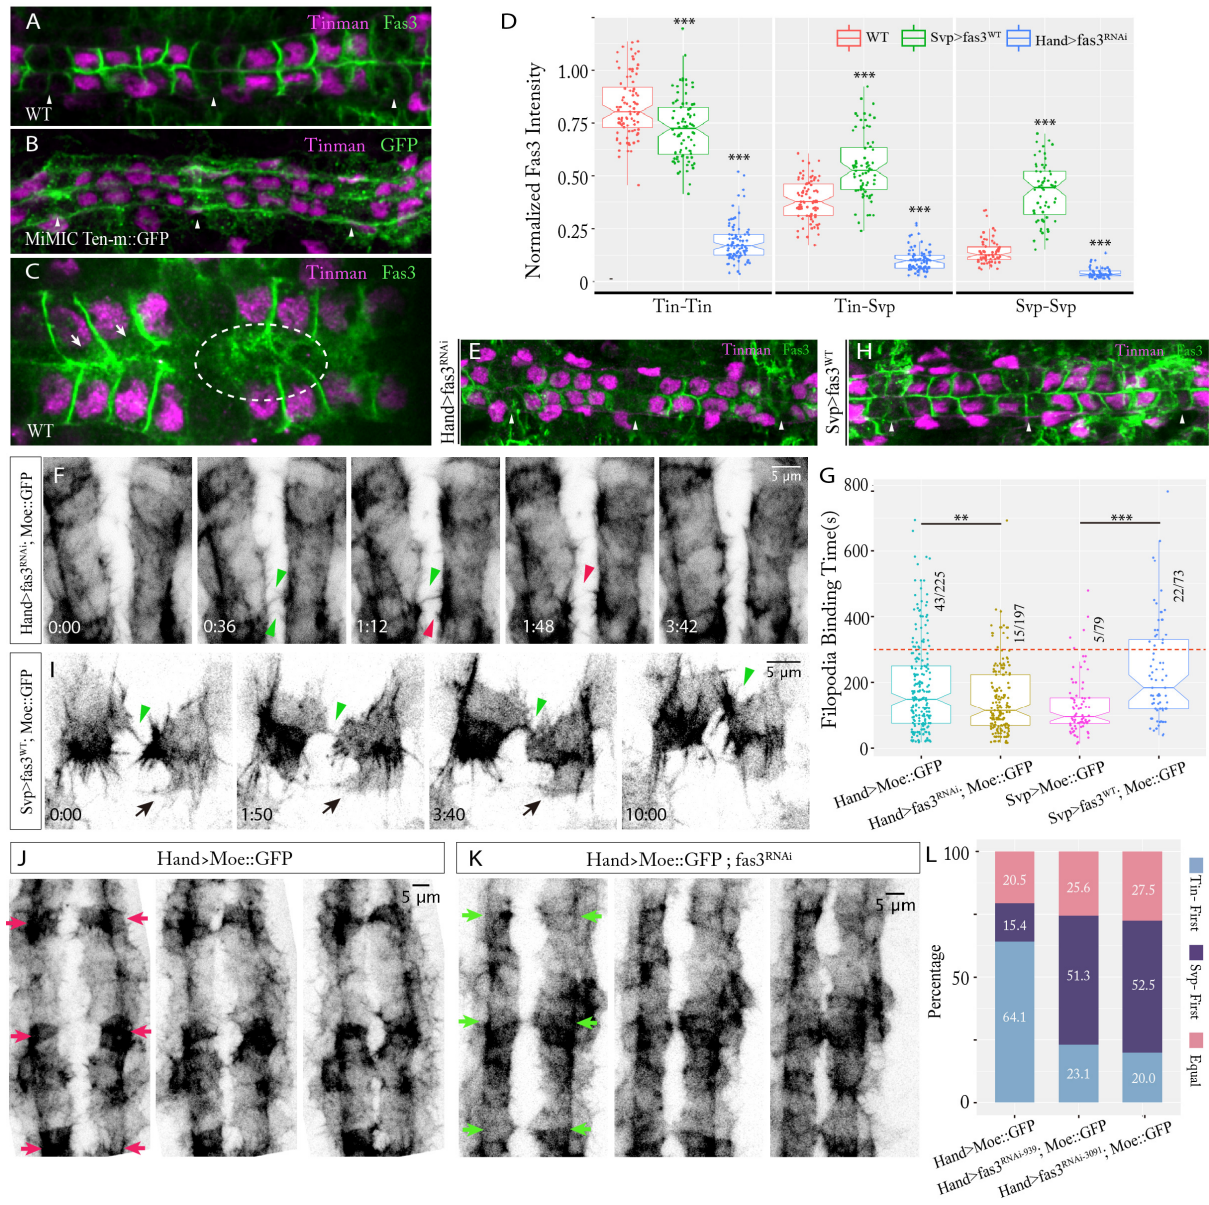

632

633 **Figure 3. Fas3 shows differential expression in *Drosophila* heart and modulates CB**  
 634 **filopodia adhesion**

635 (A, B) Expression patterns of Fas3 (A) and Ten-m (B) in the heart at early Stage 17. (C) Fas3  
 636 localization between contralateral CB partners at Stage 16, highlighted by dashed ellipse.  
 637 Arrows point to Fas3 pools near the forming cell-cell junctions. (D) Normalized Fas3 intensity  
 638 at different cell-cell contacts under different experimental conditions (n=7 embryos per  
 639 condition). Data are presented as boxplot and scatter plot (\*P<0.05, \*\*P<0.01, \*\*\*P<0.001

640 compared to the wildtype at each different cell-cell contact). (E) Hand>fas3<sup>RNAi</sup> embryos  
641 showing reduced Fas3 expression in CBs. (F) Filopodia activity in Hand>fas3<sup>RNAi</sup> embryos  
642 expressing Moe::GFP embryo (see also Figure S4C-S4D; Movie S3 Middle). (G)  
643 Quantification of filopodia binding time under different Fas3 expression conditions (see also  
644 Figure S4E). Data are presented as boxplot and scatter plot, (\*P<0.05, \*\*P<0.01, \*\*\*P<0.001).  
645 (H) Fas3 overexpression in Svp-positive CBs. (A, B, E, H) Arrowheads point to Svp-positive  
646 CBs. (I) Filopodia activity in Svp>fas3<sup>WT</sup> embryos expressing Moe::GFP (see also Movie S4  
647 Right). (F, I) Green and red arrowheads point to reinforced and transient filopodia adhesions  
648 respectively. (J, K) CB migration pattern in embryos expressing Moe::GFP under control (J)  
649 and Hand>fas3<sup>RNAi</sup> (K) conditions. Green and red arrows highlight Svp-positive CBs that  
650 initiate membrane contact and fuse earlier or later than Tin-positive cells respectively (see also  
651 Movie S5). (L) Percentage of different migration patterns under different experimental  
652 conditions (n>30 per condition); Tin-positive CBs initiate contact (blue), Svp-positive CBs  
653 initiate contact (purple), Tin- and Svp-positive CBs initiate contact at equal time (red).

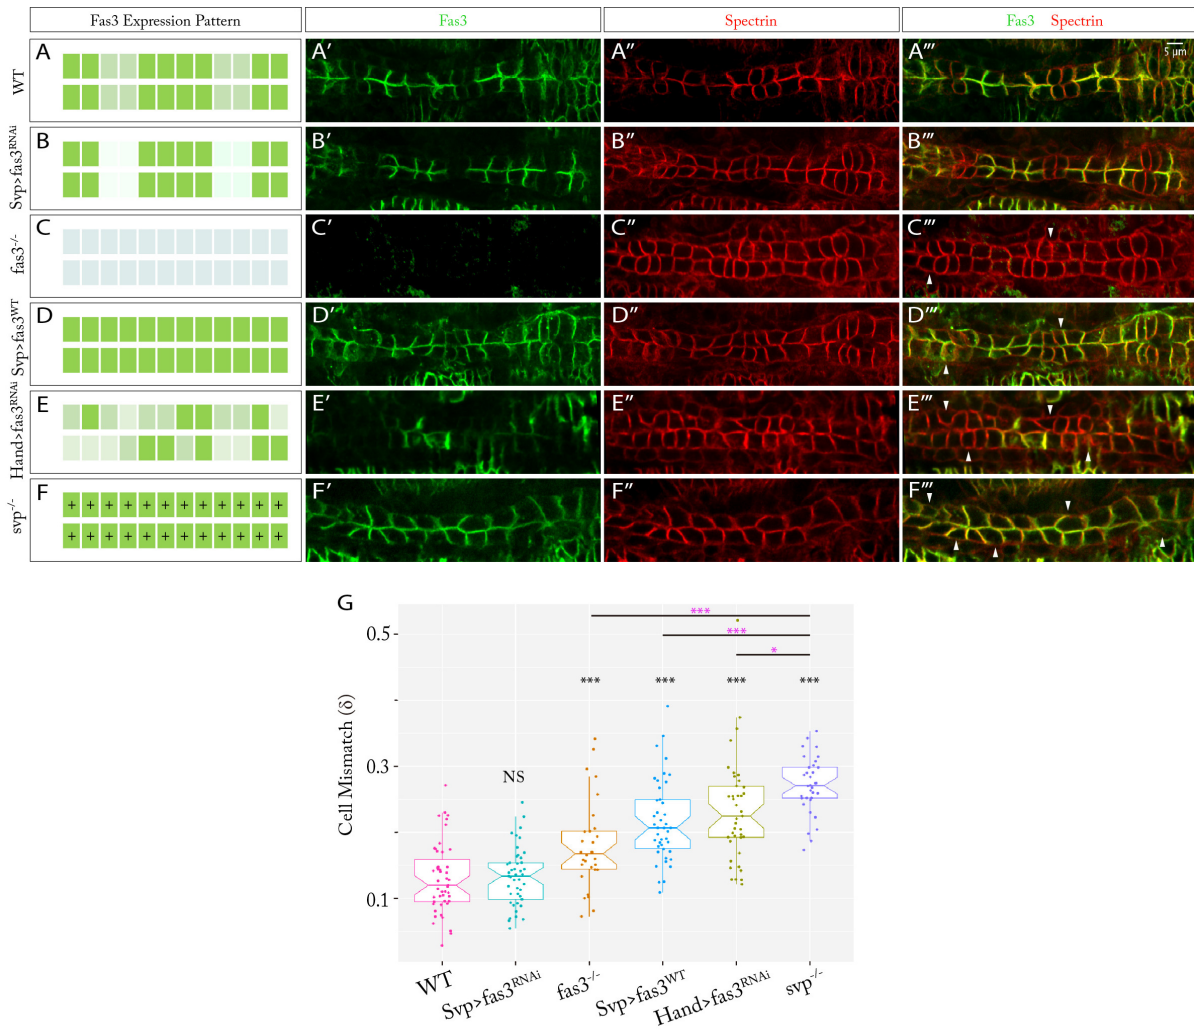

654

655 **Figure 4. Disruption of the Fas3 expression pattern alters CB matching**

656 (A-F) Schematics of various Fas3 expression patterns tested in the heart. Shades of green  
657 indicate the various Fas3 expression levels, '+' indicates all CBs are same cell type. (A'-F')  
658 Fas3 staining expression patterns under different conditions. (A''-F'') CB membrane contacts  
659 shown by Spectrin staining. (A'''-F''') Merged images of Fas3 and Spectrin staining.  
660 Arrowheads highlight clear cell mismatch. (G) Cell Mismatch ( $\delta$ ) analysis of different Fas3  
661 expression conditions (n>20 per condition). Data are presented as boxplot and scatter plot  
662 (\*P<0.05, \*\*P<0.01, \*\*\*P<0.001, NS: Not Significant, compared with WT).



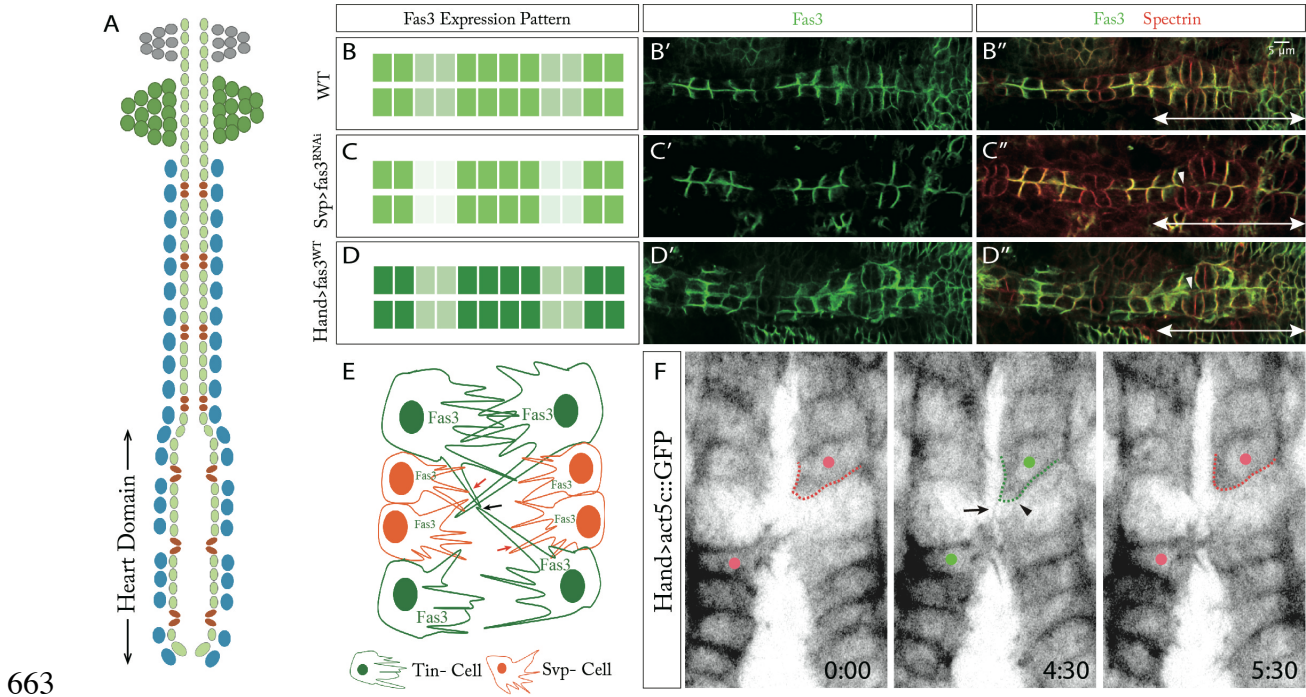

**Figure 5. Low expression of Fas3 in Svp-positive CBs is necessary for robust heart morphogenesis, especially in the heart domain**

(A) Schematic representation of the *Drosophila* heart structure, heart domain is labeled out.

(B-D) Schematics of Fas3 expression patterns tested in the heart in of wildtype,  $Svp>fas3^{RNAi}$  (H, H') and  $Hand>fas3^{WT}$ . (B'-D') Fas3 staining in the heart under different conditions. (B''-D'') Merged images of Fas3 and Spectrin staining under different conditions. Arrowhead highlights severe mismatch between Svp-positive CBs. Double-headed arrows show the heart domain. (E) Schematic demonstration of Fas3 function in Svp-positive CBs. Black arrows point to the crossover contacts between diagonal Tin-positive CBs that are neighboring Svp-positive CBs. Red arrows point to the filopodia contacts between Svp- and Tin-positive CBs. (F) Crossover filopodia contacts (black arrow pointed) between diagonal Tin-positive CBs in  $Hand>act5c::GFP$  embryos (see also Movie S6). Green and red dots label the Tin-positive CBs with or without crossover contacts, green and red dash lines label the Tin-positive CBs shape change with or without crossover contact.

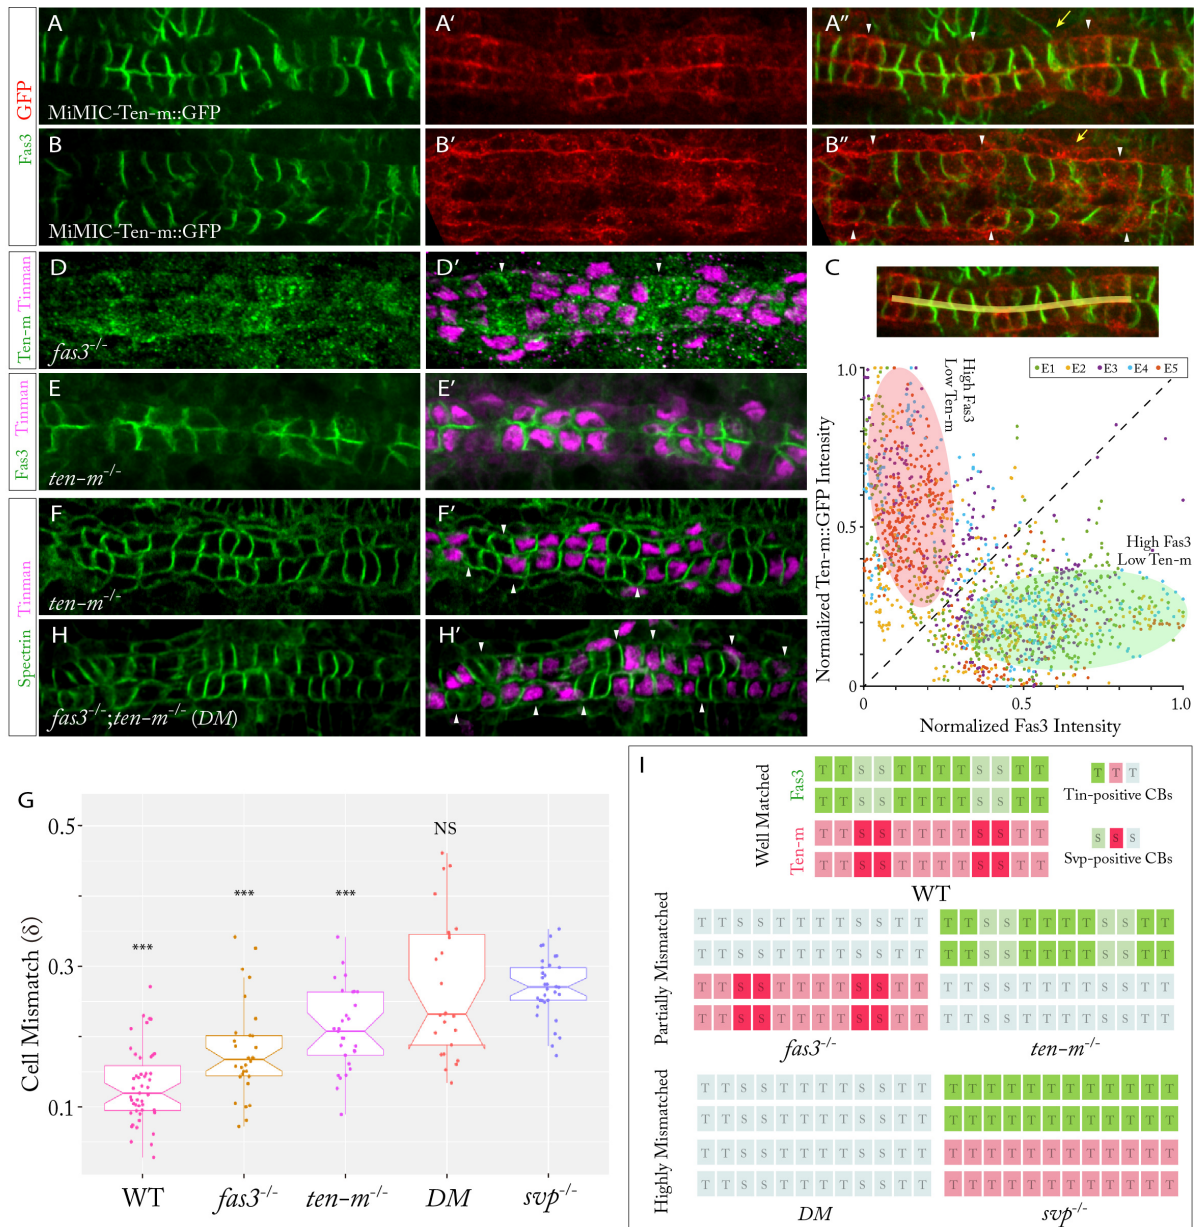

678

679 **Figure 6. Ten-m and Fas3 regulate CB matching in a complementary fashion**

680 (A-B'') Fas3 and GFP staining in MiMIC Ten-m::GFP embryos at Stage 17 (A) and Stage 16

681 (B). Arrowheads highlight regions of higher Ten-m expression, yellow arrows point to the

682 pericardial cells. (C) Comparison of Fas3 and Ten-m relative intensity at contralateral CB

683 contacts (yellow line in inset) (n=5). Green shade labels the region with high Fas3 expression

684 but low Ten-m, red shade labels the reversed pattern. (D-D') Ten-m staining expression in

685 *fas3<sup>-/-</sup>* embryo. Arrowheads highlight higher Ten-m expression. (E-E') Fas3 and Tin staining in

686 *ten-m<sup>-/-</sup>* embryo. (F-F') CB alignment in *ten-m<sup>-/-</sup>* embryo stained for Tin and spectrin. (G) Cell

687 mismatch ( $\delta$ ) quantification of different experimental conditions ( $n > 20$  per condition). Data  
688 are presented as boxplot and scatter plot (\* $P < 0.05$ , \*\* $P < 0.01$ , \*\*\* $P < 0.001$ , NS: Not Significant,  
689 compared with svp-). (H-H') CB alignment in fas3-; ten-m- embryo stained for Tin and  
690 Spectrin. Arrowheads highlight clear cell mismatch. (I) Schematics of Ten-m and Fas3  
691 complementary functions in CB matching.

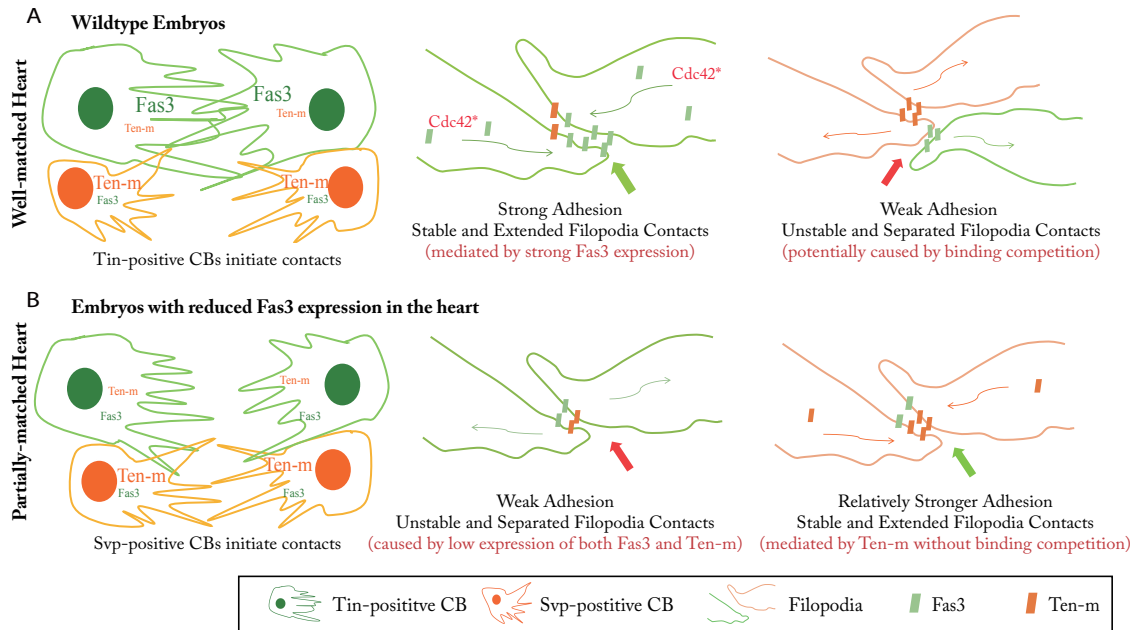

692

693 **Figure 7. Model of *Drosophila* CB matching through selective filopodia adhesion**

694 (A, B) Schematics of Fas3 and Ten-m mediated CB matching through affecting filopodia  
695 binding activities in wildtype(A) and embryos with reduced Fas3 expression in CBs (B). Font  
696 sizes of 'Fas3' and 'Ten-m' indicate the expression levels.

697

## Supplemental Information

698

699 **Selective Filopodia Adhesion Ensures Robust Cell Matching in the *Drosophila* Heart**

700

701 Shaobo Zhang<sup>1</sup>, Christopher Amourda<sup>1</sup> and Timothy E. Saunders<sup>1,2,3,#</sup>

702 <sup>1</sup> Mechanobiology Institute, National University of Singapore, Singapore

703 <sup>2</sup> Department of Biological Sciences, National University of Singapore, Singapore

704 <sup>3</sup> Institute of Molecular and Cell Biology, A\*Star, Proteos, Singapore

705

706 # For correspondence: [dbsste@nus.edu.sg](mailto:dbsste@nus.edu.sg)

707

708 **Supplementary Figures**

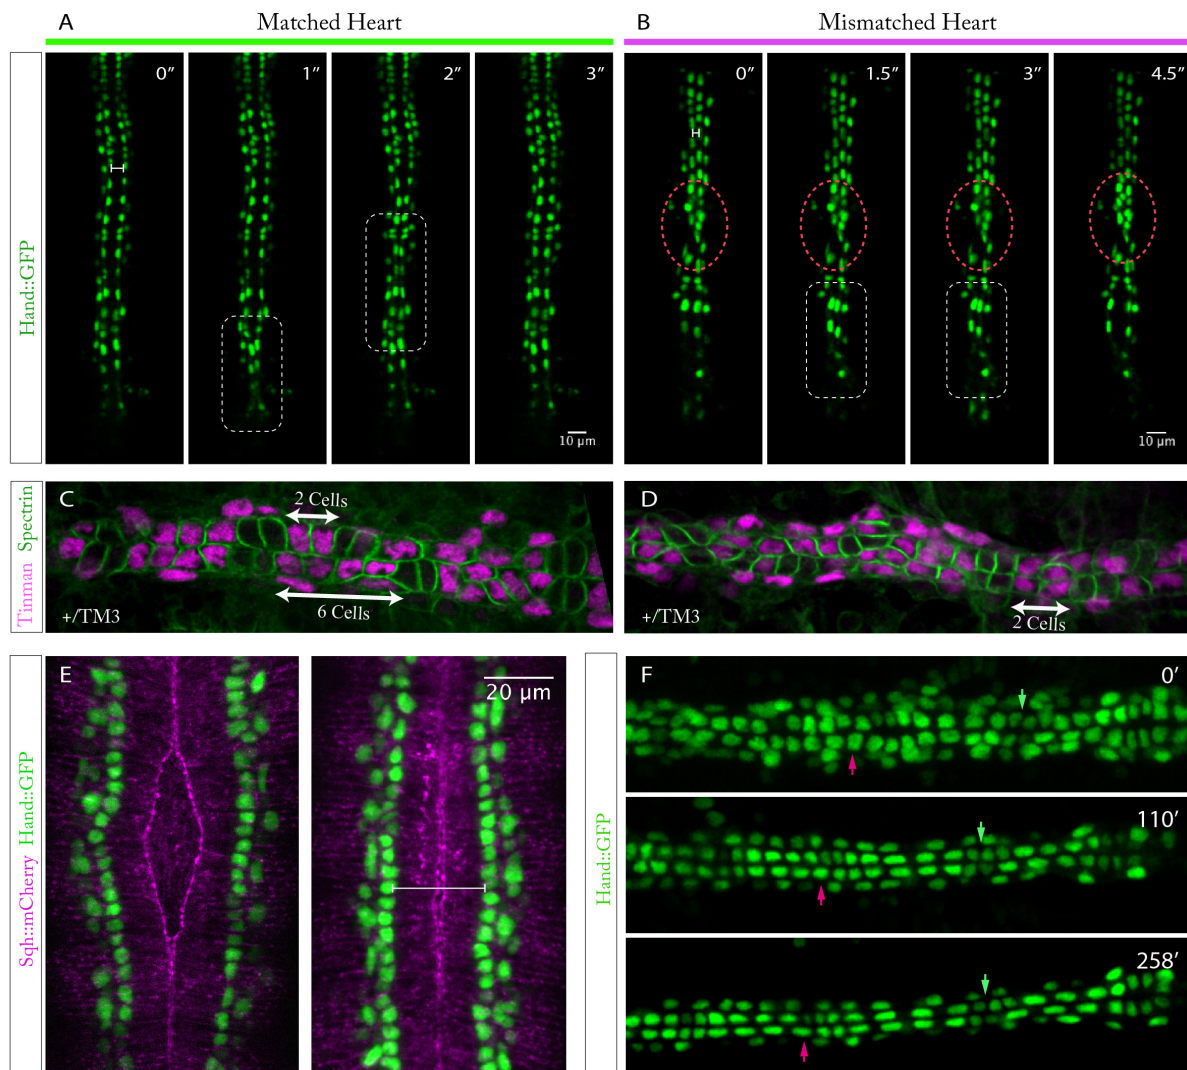

709

710 **Figure S1. *Drosophila* heart formation is a cell-type specific active matching process,**  
711 **happening in a short time window, related to Figure 1; Movies S1 and S2**

712 (A) Morphology and beating of well aligned heart in Hand::GFP embryos at late Stage 17. (B)  
713 Morphology and beating of misaligned heart in Hand::GFP embryos at late Stage 17 (n=5). (A-  
714 B) Red circles label the misaligned CBs regions, white boxes label the heart contraction regions,  
715 white bars label the contralateral CBs separation during the relax state. (C-D) CBs arrangement  
716 and alignment in +/TM3 embryos. (E) Relative position of CBs (Hand::GFP labeled)  
717 migration and epidermis dorsal closure (Sqh::mCherry labeled). White bar labels the  
718 contralateral CB separation at the time of dorsal closure finishing. (F) CBs morphology and

719 alignment after full coalescence of contralateral CBs in Hand::GFP embryos. Green and red  
720 arrows point to the matched and mismatched CBs.

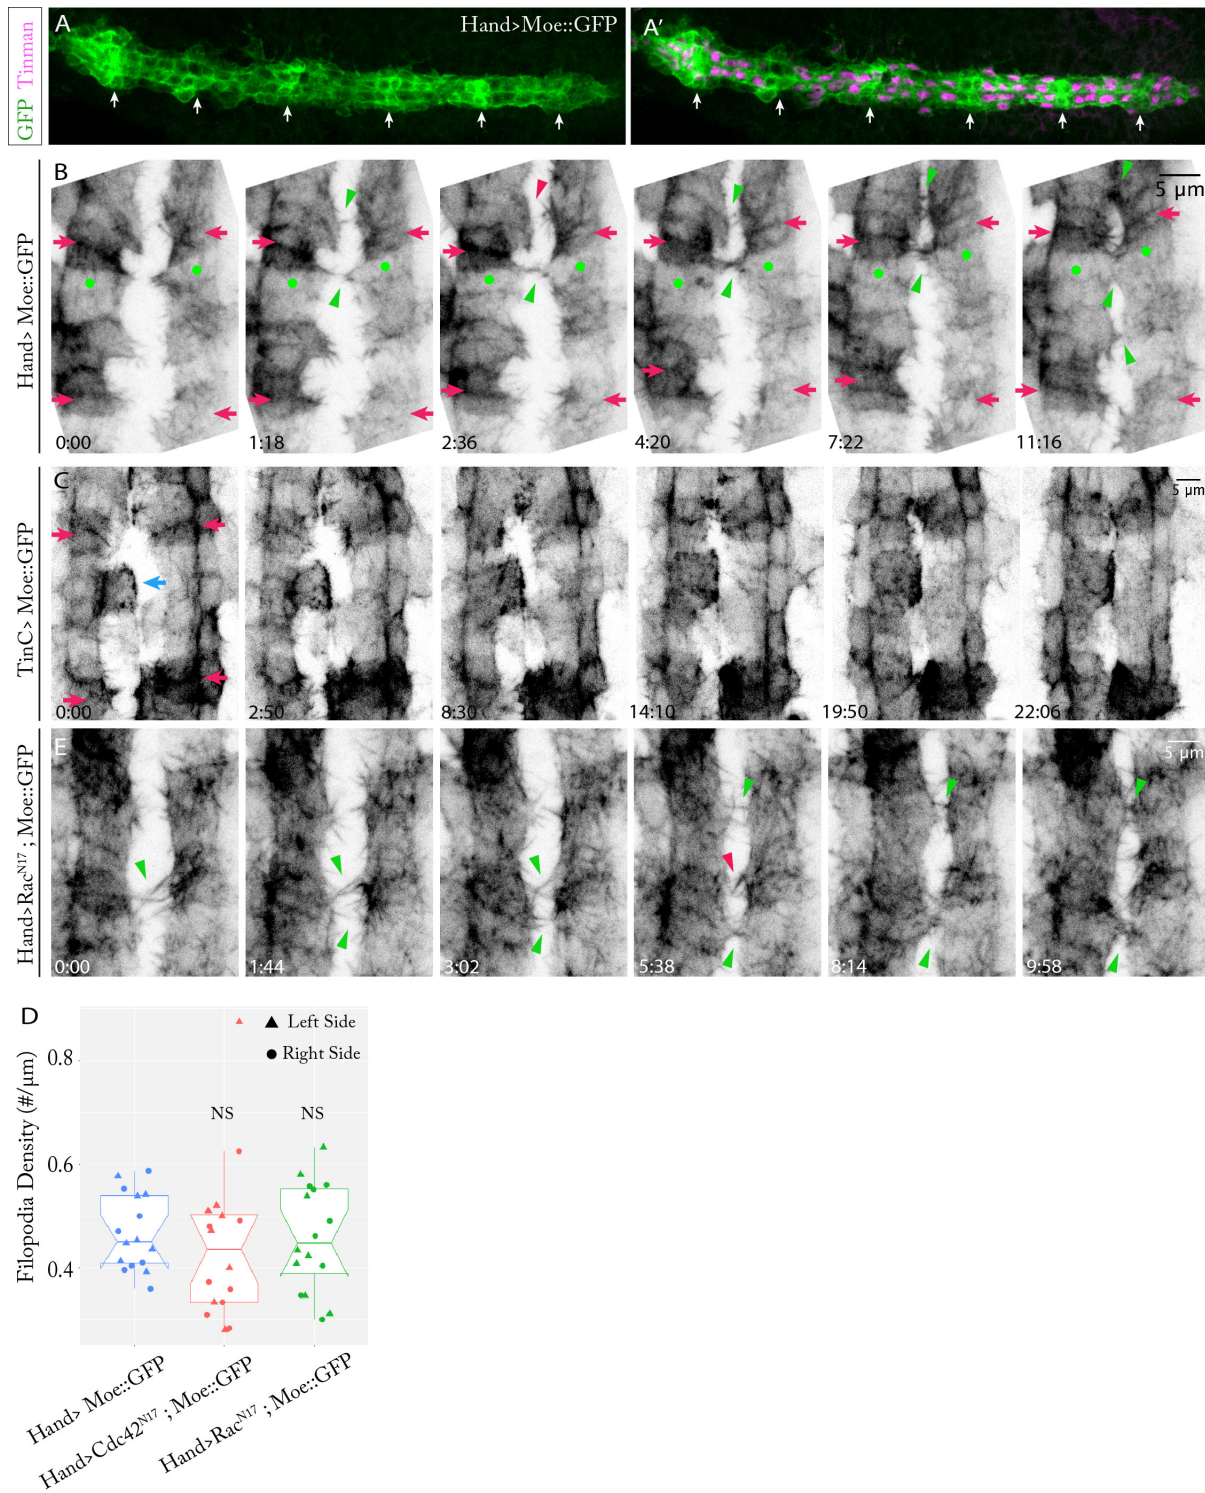

721

722 **Figure S2. CB filopodia show selective binding affinity, related to Figure 2**

723 (A-A') Expression pattern of Moe::GFP in CBs when driven by Hand-Gal4. White arrows

724 point to the Svp-positive CBs. (B) Filopodia binding activity in an Hand>Moe::GFP embryo

725 where different CB subtypes can be clearly distinguished. Red arrows point to the distinguished



726 Svp-positive CBs, green dots point to the Tin-positive CBs that makes strong filopodia binding  
727 contacts. (C) Moe::GFP expression in TinC>Moe::GFP embryo. Red and blue arrows point to  
728 the distinguished Svp-positive CBs and the surrounding aminoserosa cells. (D) Filopodia  
729 density quantification in different conditions. Data are presented as boxplot and scatter plot  
730 (n=8 per condition) (NS: Not Significant, compared with Ctrl condition). (E) Filopodia binding  
731 activity in Hand>Rac<sup>N17</sup>; Moe::GFP embryo. (B, E) Green and red arrowheads point to the  
732 established and separated filopodia contacts.

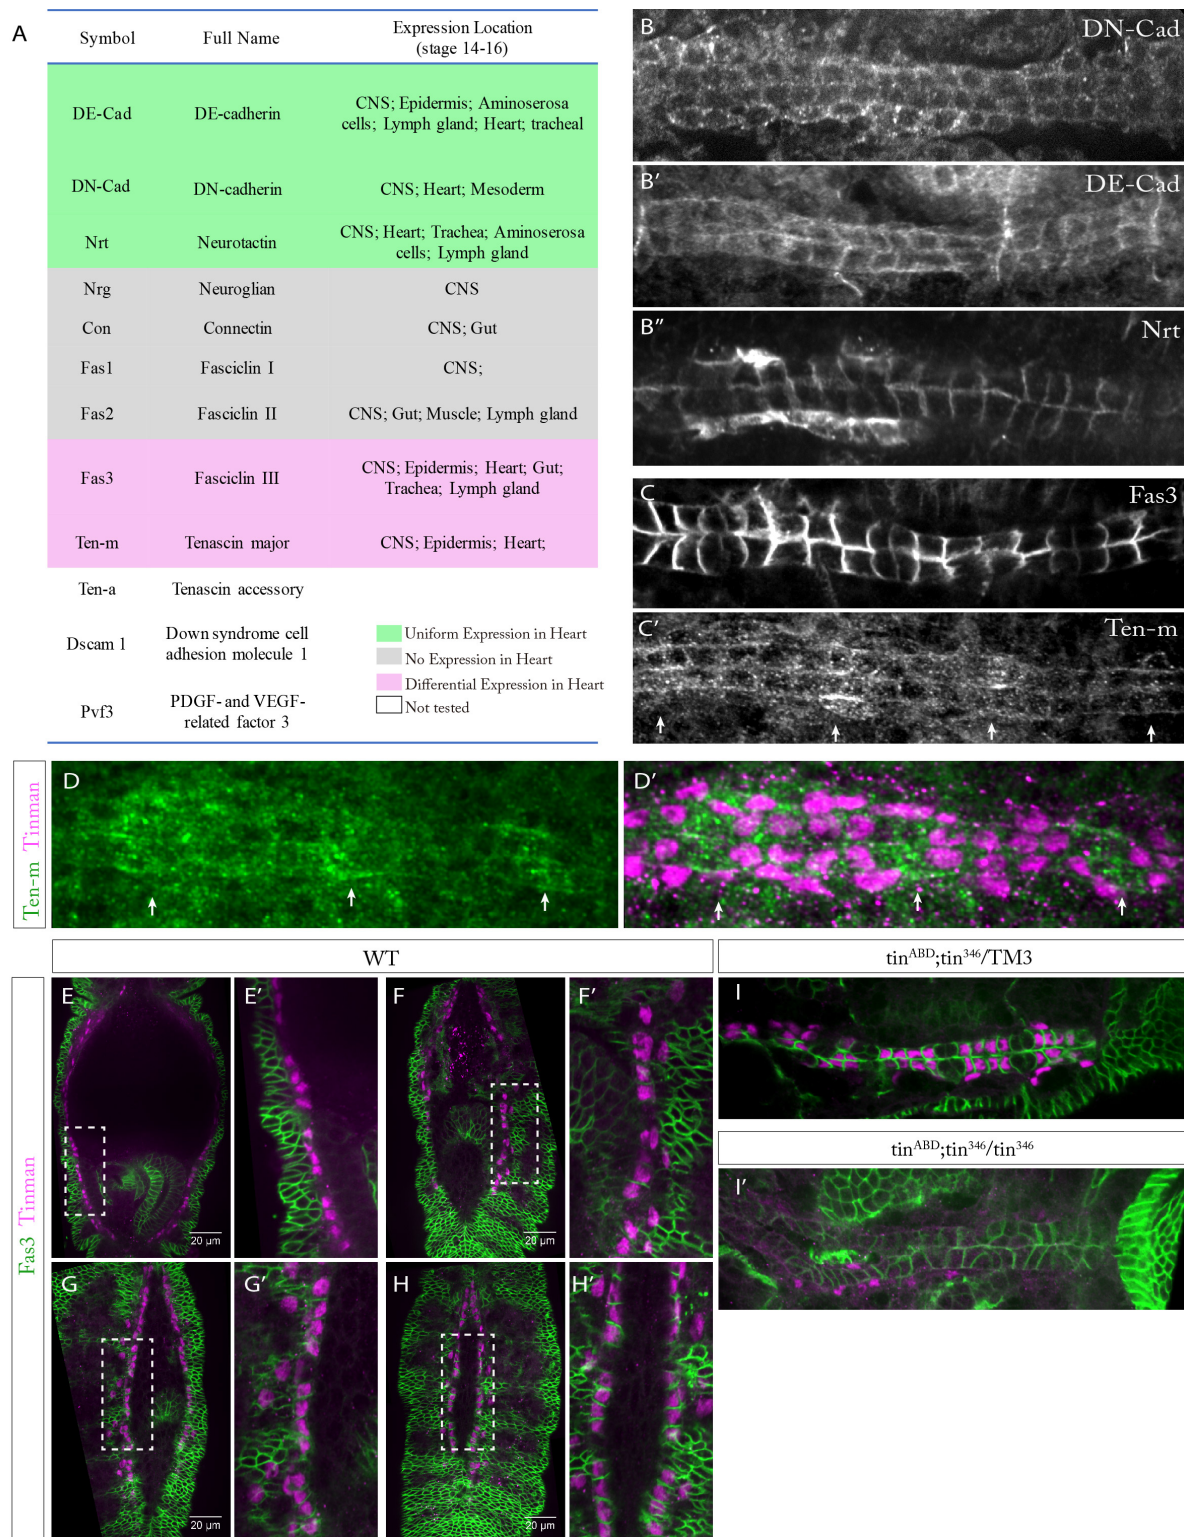

733

734 **Figure S3. Candidate screening identified differential expression of Fas3 and Ten-m in**  
 735 **CBs, related to Figure 3**

736 (A) List of candidate matching molecules and their expression locations in the embryos at stage

737 14-16. CNS: Central Nervous System. (B-B''') Expression pattern of candidate molecules DE-

738 Cad (B), DN-Cad (B') and Nrt (B'') in CBs of wild-type embryos at Stage 16. (C, C')

739 Expression pattern of Fas3 (C) and Ten-m (C') in CBs of wild-type embryos at stage 16. (D,

740 D') Ten-m and Tin staining in wild-type embryos at Stage 16. (E-H') Fas3 expression in the

741 CBs at Stage 14 (E, E'), early Stage 15 (F, F'), middle Stage 15 (G, G') and late Stage 15 (H,

742 H'). (E'-H') Magnified images of the white line labeled regions in (D-G). (I, I') Fas3

743 expression pattern and CB morphology in heterozygous (I) and homozygous (I') *tin* mutant

744 embryos.

745

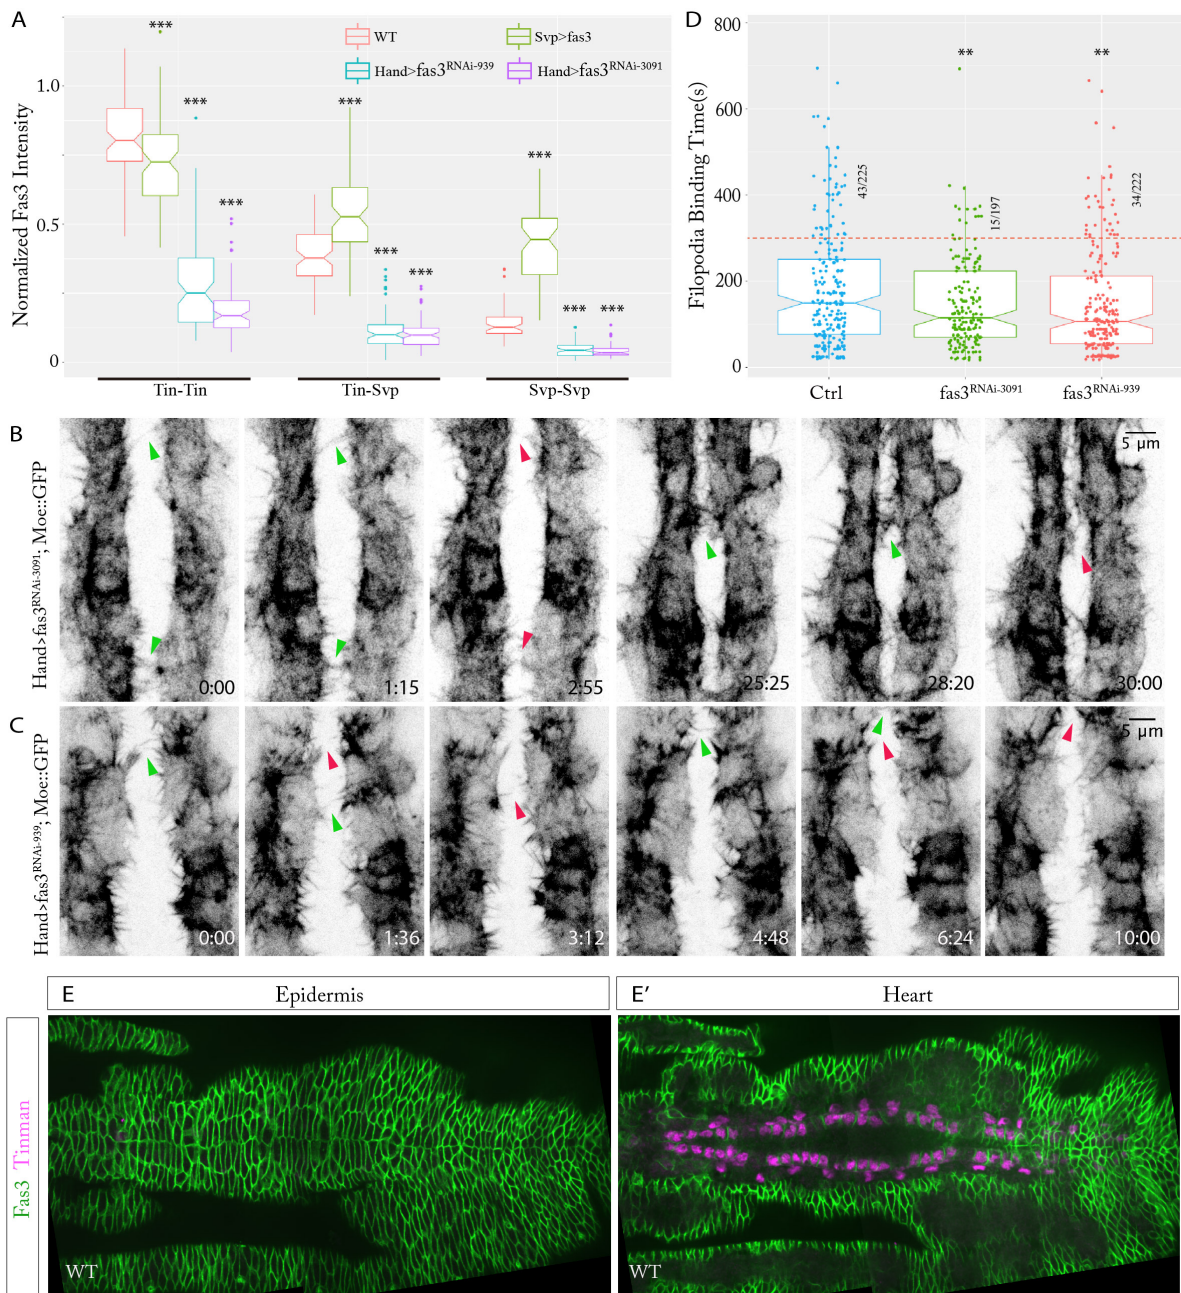

746

747 **Figure S4. *fas3*<sup>RNAi</sup> efficiently decreases the Fas3 expression in CBs and reduces CB**  
 748 **filopodia binding affinity, related to Figure 3 and Movie S3-S4**

749 (A) Fas3 intensity quantification at different cell-cell contacts in different experimental  
 750 conditions (n=7 embryos per condition). Data are presented as boxplot (\*P<0.05, \*\*P<0.01,  
 751 \*\*\*P<0.001 compared to the wildtype at each different cell-cell contact). (B, C) Filopodia  
 752 activities in Hand>*fas3*<sup>RNAi-3091</sup> (B) and Hand>*fas3*<sup>RNAi-939</sup> (C) embryos. Green and red

753 arrowheads point to the established filopodia bindings and the separated ones. (D) Filopodia  
754 binding time in different conditions. Data are presented as boxplot and scatter plot (\*P<0.05,  
755 \*\*P<0.01, \*\*\*P<0.001), red line shows the 300s criterion for strong binding. (E, E') Fas3  
756 expression in *Drosophila* epidermis (E) and heart (E') of the same embryo.

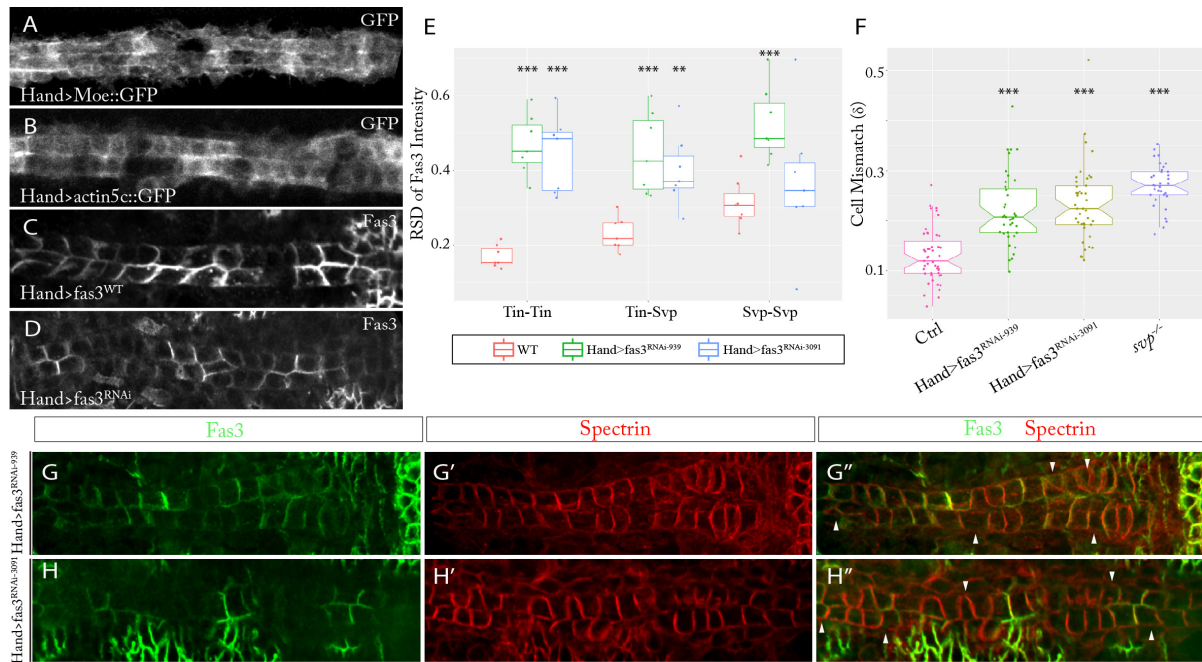

757

758 **Figure S5. Hand>Gal4 shows stochastic activity and perturbation of Fas3 expression**  
 759 **pattern alters CBs matching, related to Figure 3 and Figure 4**

760 (A-C) Expression patterns of Moe::GFP (A), act5c::GFP (B) and Fas3 (C) in the heart driven  
 761 by the same Hand-Gal4. (D) fas3<sup>RNAi</sup> driven by Hand-Gal4 generates a stochastic Fas3  
 762 expression pattern in the heart. (E) Relative standard deviation of normalized Fas3 intensity at  
 763 different cell contacts in different experimental conditions (n=7 per condition). (F) CBs  
 764 Mismatch ( $\delta$ ) analysis of different experimental conditions (n>20 per condition). (E, F) Data  
 765 are presented as boxplot and scatterplot (\*P<0.05, \*\*P<0.01, \*\*\*P<0.001 compared to the  
 766 wildtype). (G-H'') Fas3 expression pattern and CBs alignment in Hand>fas3<sup>RNAi-939</sup> (G-G'')  
 767 and Hand>fas3<sup>RNAi-3091</sup> (H-H'') embryos with different fas3<sup>RNAi</sup> driven by Hand-Gal4. White  
 768 arrowheads point to the cells with obvious mismatch.

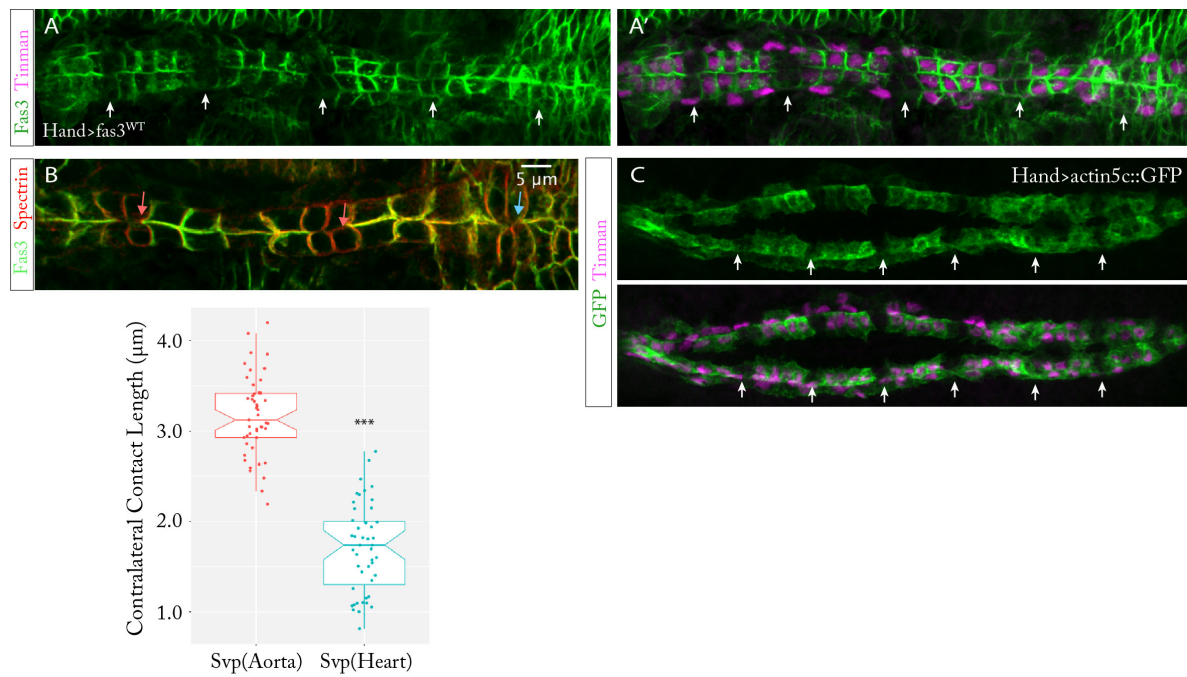

769

770 **Figure S6. Low expression of Fas3 in Svp-positive CBs is essential for robust heart**  
771 **morphology, related to Figure 5**

772 (A, A') Fas3 expression in CBs with Fas3 overexpression driven by Hand-Gal4. (B)  
773 Contralateral contact length of Svp-positive CBs at the aorta (red arrows pointed) and heart  
774 (blue arrow pointed) domains. Data are presented as boxplot and scatterplot (\*P<0.05,  
775 \*\*P<0.01, \*\*\*P<0.001). (C) Act5c::GFP expression in the CBs when driven by Hand>Gal4.

776 (A, A', C) White arrows point to the locations of Svp-positive CBs.

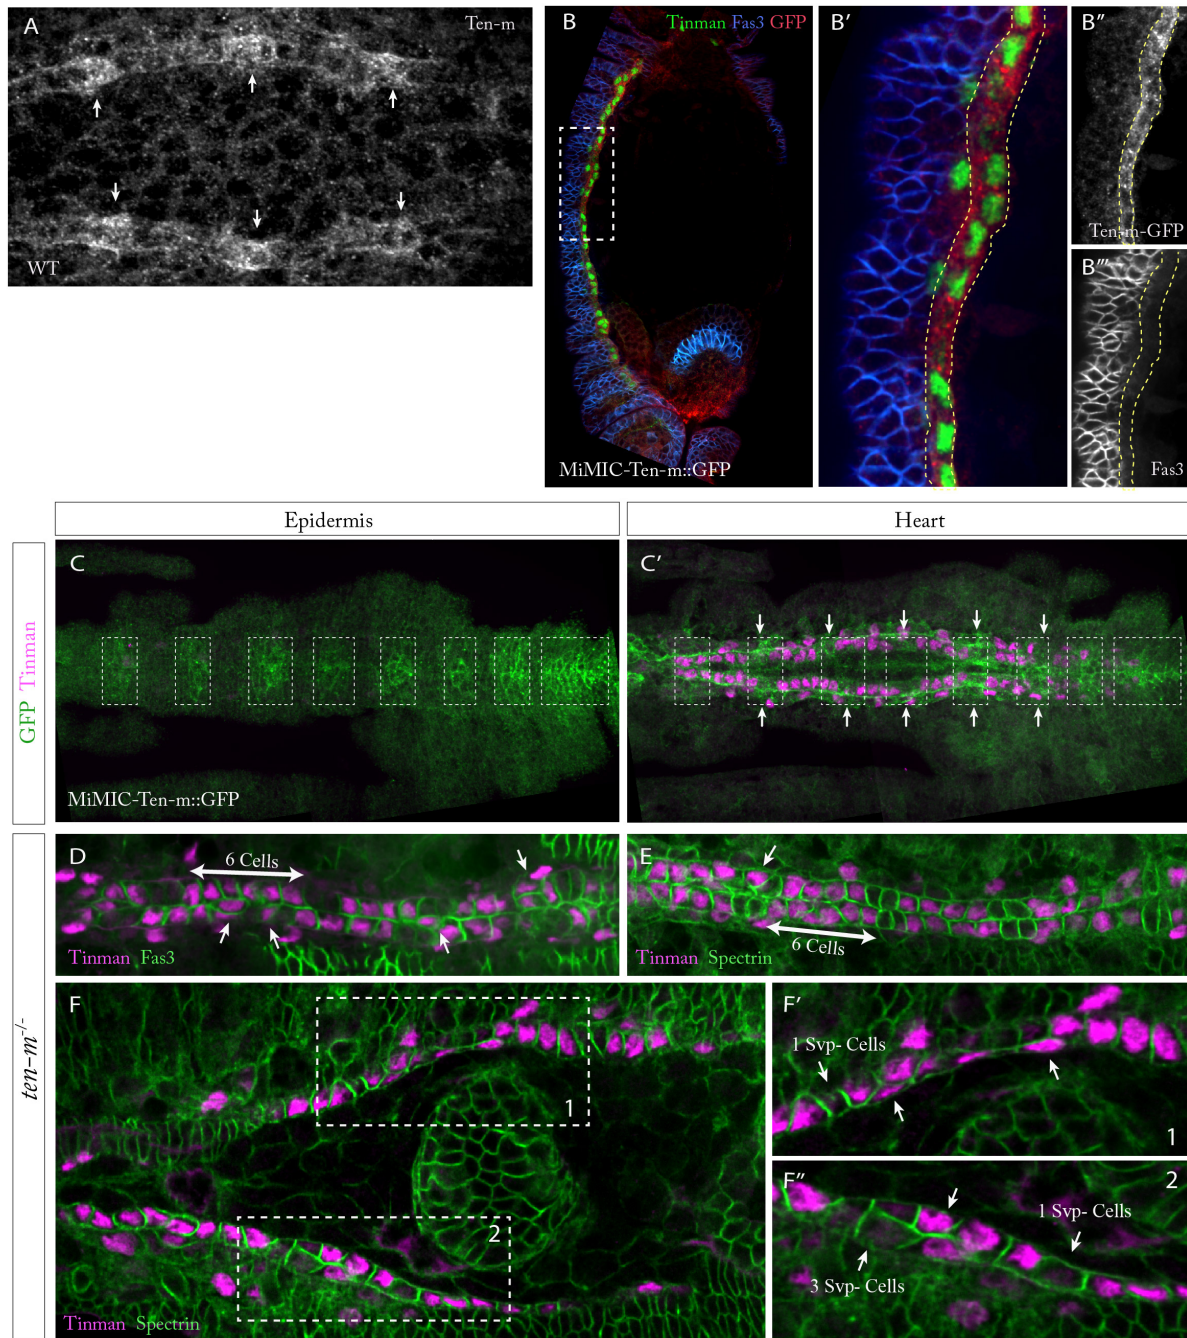

777

778 **Figure S7. Ten-m shows differential expression in the heart and loss of Ten-m causes CBs**  
 779 **arrangement defects, related to Figure 6**

780 (A) Ten-m staining image of wild-type embryo heart at Stage 15. White arrows point to the  
 781 high Ten-m expression regions. (B) Expression of Ten-m and Fas3 in the heart at the beginning  
 782 of Stage 14. (B') Magnified image of the white box labelled region in B. (B'') Ten-m  
 783 expression channel in (B'). (B''') Fas3 expression channel in (B'). (B'-B''') Yellow lines label



784 out the regions of CBs location. (C, C') Localized expression of Ten-m in epidermis (C) and  
785 heart (C') in the same embryo. White boxes label the high Ten-m expression regions in  
786 epidermis, white arrows point to the Svp-positive CBs locations. (D-F) CBs arrangement defect  
787 in ten-m mutant embryos at Stage 16 and Stage 15. (F'-F'') Magnified images of the white  
788 boxes labelled regions in G. White arrows point to the regions with CBs miss-arrangement.

789 **STAR Methods**

790 **Fly stocks and genetics:**

791

792 Fly stocks were maintained at 25°C on standard fly food. The following fly stocks were used:

793 Sqh::mCherry (a gift from Yusuke Toyama's Lab). Hand::GFP, Hand-Gal4 (R25) (a gift from

794 Zhe Han's Lab), tin<sup>ABD</sup>; Tin<sup>346</sup>/TM3 (a gift from Manfred Frasch's Lab), TinC>Gal4 (a gift

795 from Rolf Bodmer's Lab). Fly lines from the Bloomington Drosophila Stock Center: Svp>Gal4

796 (BL #47912), Svp[AE127] (BL #26669), UAS>Moe::GFP (BL #31776), Fas3[E25] (BL

797 #4748), Mimic-Ten-m::GFP (BL #59798), Ten-m [5309] (BL #11657), UAS>Cdc42<sup>N17</sup> (BL

798 #6288), UAS>Rac<sup>N17</sup> (BL #6292), UAS>act5c::GFP (BL #9257), TM6b-Ubi::GFP (from BL

799 #4887, used for distinguishing homozygous Ten-m mutant). Both RNAi lines targeting *fas3*

800 from the Vienna *Drosophila* RNAi Center: UAS>fas3<sup>RNAi</sup> (VDRC ID3091, ID939).

801

802 Hand::GFP is a transgene carrying a GFP reporter driven by the Hand cardiac and

803 hematopoietic (HCH) enhancer (Han, 2006). UAS-Moe::GFP is a transgene with GFP tagged

804 to the actin-binding domain of moesin (Dutta et al., 2002).

805

806 A UAS-Fas3 fly line was generated by P-element transformation, carried out by BestGene Inc.

807 The UASp-Fas3 plasmid was a gift from Victor Hatini (de Madrid et al., 2015).

808

809 **Stochastic activity of Hand-Gal4 in the *Drosophila* heart:**

810

811 Gene expression (Moe::GFP, act5c::GFP, *fas3* tested here) driven Hand>Gal4 results in

812 stochastic expression pattern, especially among the cells of same CB subtype (Figure S5A-

813 S5D). Similarly, this variable and unstable Gal4 activity has also been very recently described

814 in other enhancer-Gal4 lines (Casas-Tintó et al., 2017). Likely, this stochastic Gal4 activity is  
815 related to the primary sequence of insertion site as well as the complex three-dimensional  
816 structures of the chromosome. Moreover, when driven by Hand>Moe::GFP shows higher  
817 expression in Svp-positive CBs (Figures S2A and S2A'), but act5c::GFP (Figure S5K) and  
818 Fas3 (Figures S5I and S5I') show higher expression in Tin-positive CBs. This indicates that  
819 post-transcriptional regulation potentially exists for these different molecules in distinct CB  
820 subtypes.

821

## 822 **Immunostaining:**

823

824 *Drosophila* embryos were collected at the desired stage, dechorionated in household bleach  
825 and fixed in 4% formaldehyde and blocked with 10% BSA in PBT (0.1% Triton in PBS)  
826 according to standard procedures. To do co-staining of Fas3 and Spectrin (both were generated  
827 in mouse host), sequential staining was performed – after the staining of Fas3 using the  
828 standard procedures, 4% PFA (in PBS) was used to post-fix the embryos for 20mins, then  
829 staining of Spectrin was continued in standard methods. The following primary antibodies were  
830 used in this study: rabbit anti-Tinman (1:1000), chicken anti-GFP (1:1000, ThermoFisher  
831 Cat#A10262/invected RRID: AB\_2534023), mouse anti-Spectrin (1:400, DSHB Cat# 3A9  
832 (323 or M10-2) /invected RRID: AB\_528473), rat anti-ECad (1:300, DSHB Cat#  
833 DCAD2/invected RRID: AB\_528120), rat anti-CadN (1:300, DSHB Cat# DN-Ex #8/invected  
834 RRID: AB\_528121), mouse anti-Nrg (1:300, DSHB Cat# BP 104 anti-Neuroglian /invected  
835 RRID: AB\_528402), mouse anti-Nrt (1:300, DSHB Cat# BP 106 anti-Neurotactin /invected  
836 RRID: AB\_528404), mouse anti-Con (1:300, DSHB Cat# Connectin C1.427 /invected RRID:  
837 AB\_10660830), mouse anti-Fas1 (1:30, DSHB Cat# F5H7 anti-Fasciclin I /invected RRID:  
838 AB\_528233), mouse anti-Fas2 (1:300, DSHB Cat# 1D4 anti-Fasciclin II/invected RRID:

839 AB\_528235), mouse anti-Fas3 (1:300, DSHB Cat# 7G10 anti-Fasciclin III/injected RRID:  
840 AB\_528238, monoclonal anti-Ten-m (Mab113, 1:100). Primary antibodies were detected with  
841 Alexa Fluor-labelled secondary antibodies (1:500; LifeTech). Embryos were imaged on a  
842 Nikon SpinningDisk\_W1\_LiveSR with a CFI Plan Achromat 100x/1.45 NA oil immersion  
843 objective. Tinman antibody was kindly provided by Manfred Frasch. Ten-m antibody was a  
844 gift from Stefan Baumgartner.

845

#### 846 **Live Imaging:**

847

848 Embryos were collected, dechorionated, mounted on a MatTek dish and imaged on Zeiss  
849 LSM710 microscope. For the imaging of Hand::GFP; histone::mCherry lines, embryos were  
850 imaged using a C-Apochromat 40x/1.2 NA water-immersion objective with an interval time of  
851 5mins. Hand::GFP labelled heart beating was imaged using a C-Apochromat 40x/1.2 NA  
852 water-immersion objective with interval time 1s. Hand::GFP; sqh>Sqh::mCherry embryos  
853 were imaged using a C-Apochromat 63x/1.2 NA water-immersion objective with interval time  
854 2mins. All UAS-Moe::GFP labelled filopodia activities were imaged using C-Apochromat  
855 63x/1.2 NA water-immersion objective with interval time 20-30 seconds.

856

#### 857 **Cell tracking**

858

859 Tracking of Hand::GFP labelled CBs migration over long time was done in a custom-built  
860 software in Matlab R2015a. Before analysis, each Z-stack for each time point was Z-projected  
861 (maximum intensity) in ImageJ. In the tracking software, individual CB at each time point was  
862 detected using the 'imfindcircles' function in Matlab, and the position information (including  
863 x, y, t) of each cell centre ( $P^t$ ) stored. The image at frame  $t+1$  was compared to frame  $t$  and

864 analysed with Particle Image Velocimetry (PIV) algorithm (original code from  
865 ‘OpenPIV’)(Taylor et al., 2010). The predicted new position ( $P^p$ ) of each cell centre ( $P^t$ ) at  
866 frame  $t+1$  ( $P^{t+1}$ ) was derived based on the predicted velocity results from PIV analysis. To  
867 decrease the prediction noise in PIV, the averaged predicted velocity of a 3x3 point window  
868 (with  $P^t$  centred) was used for the predicted velocity ( $P^v$ ). The predicted cell centre position at  
869 frame  $t+1$  ( $P^p$ )= $P^t+P^v$ . Next the tracked position of  $P^t$  at frame  $t+1$  ( $P^{t+1}$ ) was assigned to the  
870 nearest detected cell centre at frame  $t+1$  to  $P^p$ . Manual correction was performed to further  
871 increase the tracking precision.

872

873 Individual cell tracking shown in SF.2 C’’ was done in Bitplane Imaris 8.2.0. Images were  
874 segmented using automatic spots detection for GFP channel and adjusting threshold  
875 accordingly. Cell tracking was performed by using the autoregressive motion algorithm.

876

### 877 **Mismatch Quantification**

878

879 Mismatch measurement based on membrane contacts was done in ImageJ. Partner cells were  
880 assigned by their cell type marker and relative position in the repeated 4-2 cell arrangement. In  
881 *svp*<sup>-</sup> mutant, the cell from contralateral side that formed the largest contact was assigned as the  
882 partner of the cell being measured. Junction points between cell lateral boundaries and the  
883 middle contact line of the two contralateral sides were manually labeled out. Each contact  
884 length between two neighbored points was estimated by their direct distance. Length of these  
885 contacts was assigned to different cells and classified into ‘matched contact’ or ‘mismatched  
886 contact’ based on whether it is between two partner cells or not. Mismatch rate is calculated by  
887 dividing the mismatched contact length with total membrane contact length. With this  
888 definition, the mismatch value ranged between 0 and 0.5.

889

890 Mismatch measurement based on cell tracking was done in Matlab. Through the automatic cell  
891 tracking, the cell positions were stored. To increase the measurement quality, only the tracked  
892 cells in the middle region (segments ~A2-A5) were used for this analysis. Partner cells were  
893 defined in the last time frame, cells from contralateral sides with minimum center distance  
894 separation were assigned as partner cells. Midline at each frame was defined as the regression  
895 line of center points between each partner cells. Each cell center was projected towards the  
896 midline, and the distance between projected lines of two partner cells was assigned as the  
897 mismatch distance. The mismatch was then calculated by dividing the averaged mismatch  
898 distance by the averaged distance of neighboring cells.

899

#### 900 **Quantification of filopodia binding time**

901

902 Moe::GFP labeled filopodia binding activities were visualized and analyzed using Zen Lite  
903 2012 (Blue edition). The filopodia contact initiation time frame  $f^{in}$  and the separation time  
904 frame  $f^{end}$  were recorded. For the contacts that held until the full cell fusion, the time frame that  
905 the filopodia structure is not distinguishable is recorded as  $f^{end}$ . The filopodia binding time was  
906 calculated, binding time= image interval time  $\times (f^{end} - f^{in})$ .

907

#### 908 **Quantification of Normalized Fas3 Intensity**

909

910 Fas3 intensity was measured using ImageJ. Fas3 intensity at epidermis cell-cell boundaries was  
911 measured, averaged and defined as  $I_e$ . Fas3 intensity in non-Fas3 expressing cells in the same  
912 embryo was measured, averaged and defined as the background intensity,  $I_b$ . Fas3 intensity at

913 CB-CB boundaries ( $I_{CB}$ ) in the same embryo was measured and normalized ( $I_{NCB}$ ) to 0-1  
914 according to its relative value to  $I_e$  and  $I_b$ :  $I_{NCB} = (I_{CB} - I_b) / (I_e - I_b)$ .

915

## 916 **Statistical analysis**

917

918 Statistical analysis was performed with Matlab using two sample t-test. Plots were generated  
919 using R. When comparing fraction of embryos displaying phenotypes, the p-value was  
920 calculated using a Chi-squared test.

921

## 922 **SUPPLEMENTAL REFERENCES**

923

924 Casas-Tintó, S., Arnés, M., and Ferrús, A. (2017). *Drosophila* enhancer-Gal4 lines show  
925 ectopic expression during development. *R. Soc. Open Sci.* *4*, 170039.

926 Dutta, D., Bloor, J.W., Ruiz-Gomez, M., VijayRaghavan, K., and Kiehart, D.P. (2002). Real-  
927 time imaging of morphogenetic movements in *Drosophila* using Gal4-UAS-driven expression  
928 of GFP fused to the actin-binding domain of moesin. *Genesis* *34*, 146–151.

929 Han, Z. (2006). Hand, an evolutionarily conserved bHLH transcription factor required for  
930 *Drosophila* cardiogenesis and hematopoiesis. *Development* *133*, 1175–1182.

931 de Madrid, B.H., Greenberg, L., and Hatini, V. (2015). RhoGAP68F controls transport of  
932 adhesion proteins in Rab4 endosomes to modulate epithelial morphogenesis of *Drosophila*  
933 leg discs. *Dev. Biol.* *399*, 283–295.

934 Taylor, Z.J., Gurka, R., Kopp, G.A., and Liberzon, A. (2010). Long-duration time-resolved  
935 PIV to study unsteady aerodynamics. *IEEE Trans. Instrum. Meas.* *59*, 3262–3269.

936 **SUPPLEMENTAL MOVIE TITLES AND LEGENDS**

937 **Movie S1. Heart morphology and beating in Hand::GFP embryos, related to Figure S1**

938 Time-lapse image of Hand::GFP (green color) labelled heart beating with well aligned (left)  
939 and misaligned (right) CBs. Time given in min:sec. The same data are presented as montage  
940 in Figures S1A and Figure S1B, respectively.

941

942 **Movie S2. Relative position of CBs migration and dorsal closure, related to Figure 1 and**  
943 **Figure S1**

944 (Left) Time-lapse image of Hand::GFP (green color) labelled CBs migration and their relative  
945 position with dorsal closure (Sqh::mCherry labelled, magenta color). (Right) Cell tracking of  
946 individual CBs using the same movie (the cell traces are labelled with migration traces color-  
947 coded by migration speed). The same data are presented as montage in Figures 1I and Figure  
948 S1E.

949

950 **Movie S3. Filopodia activity in control, fas3<sup>RNAi</sup>, and Cdc42<sup>N17</sup> expressed CBs, related to**  
951 **Figure 2 and Figure 3**

952 Time-lapse image of Moe::GFP marked CBs actin cytoskeleton, especially filopodia, activity  
953 in Hand>Moe::GFP (Left), Hand>fas<sup>RNAi</sup>; Moe::GFP (middle), Hand>Cdc42<sup>N17</sup>; Moe::GFP  
954 (right) embryos. Time given in min:sec. The same data are presented as montage in Figures  
955 2B, 2E and Figure 3F respectively.

956

957 **Movie S4. Filopodia activity in control and Fas3 overexpressed Svp-positive CBs, related**  
958 **to Figure 2 and Figure 3**



959 Time-lapse image of Moe::GFP marked CBs actin cytoskeleton, especially filopodia, activity  
960 in Svp>Moe::GFP (Left), Svp>fas3<sup>WT</sup>; Moe::GFP (right) embryos. Time given in min:sec. The  
961 same data are presented as montage in Figures 2D and Figure 3I, respectively.

962

963 **Movie S5. CBs migration pattern in control and fas3<sup>RNAi</sup> expressed embryos, related to**  
964 **Figure3**

965 Time-lapse image of Moe::GFP marked CBs migration in Hand>Moe::GFP (Left), Hand>  
966 fas<sup>RNAi</sup>; Moe::GFP (right) embryos. Time given in min:sec. The same data are presented as  
967 montage in Figures 3J and Figure 3K, respectively.

968

969 **Movie S6. Filopodia activity of Tin-positive CBs neighboring Svp-positive CBs in**  
970 **Hand>act5c::GFP embryos, related to Figure 5**

971 Time-lapse image of act-5c::GFP marked CBs filopodia activity in Hand>act-5c::GFP  
972 embryos. Time given in min:sec. The same data are presented as montage in Figures 5F.
